# Supplementary material for: Phylogenetically Driven Sequencing of Extremely Halophilic Archaea Reveals Strategies for Static and Dynamic Osmo-response
Source: PubMed Central journal article supplement (PMC4230888; doi:10.1371/journal.pgen.1004784), 2014-11-13
Supplement: pgen.1004784.s006.pdf [file pgen.1004784.s006.pdf]

# DNA binding pocket

*A. fulgidus*

*M. hungatei*

*M. paludicola*

*Nmn. pharaonis* *Har. marismortui*

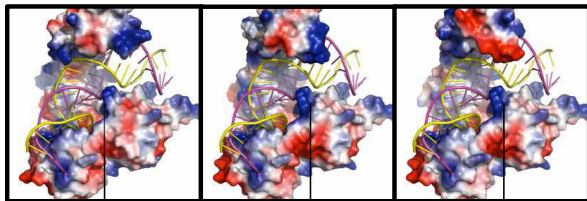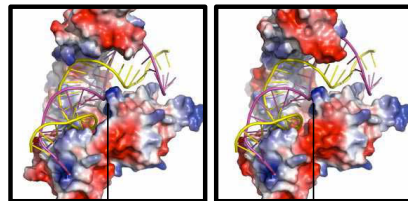

Close-up

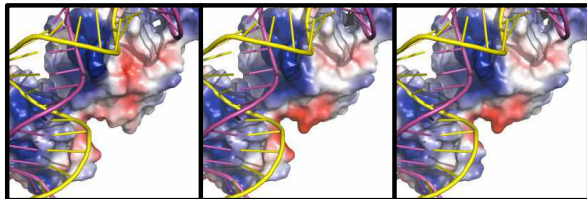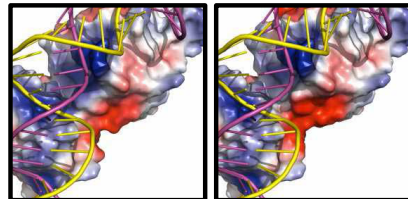

← No acidic enrichment →

# Opposite site

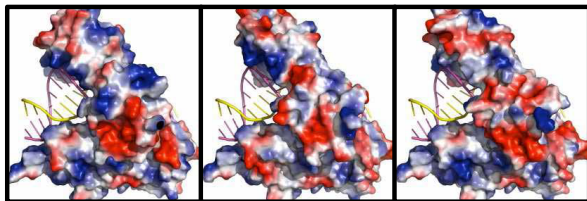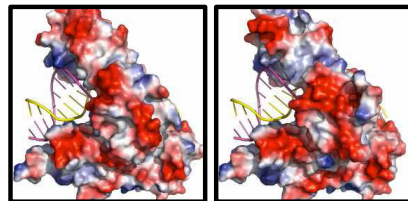

← No acidic enrichment →

← Acidic enrichment →
