# Supplementary material for: Phylogenetically Driven Sequencing of Extremely Halophilic Archaea Reveals Strategies for Static and Dynamic Osmo-response
Source: PubMed Central journal article supplement (PMC4230888; doi:10.1371/journal.pgen.1004784), 2014-11-13
Supplement: pgen.1004784.s007.pdf [file pgen.1004784.s007.pdf]

Face involved in tRNA binding (green circle)

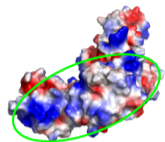

*P. torridus*

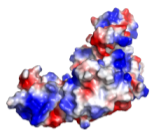

*A. fulgidus*

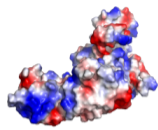

*M. maripaludis*

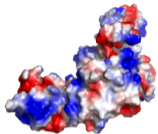

*M. acetivorans*

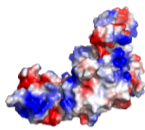

*M. mazei*

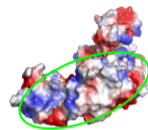

*Hqt. waslbyi*

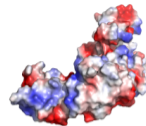

*Hbt. salinarum*

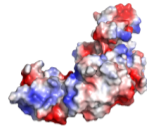

*Nmn. pharaonis*

No acidic enrichment

Face exposed to solvent

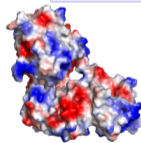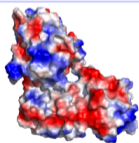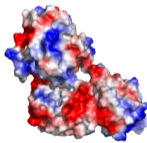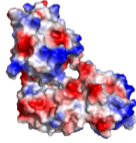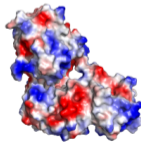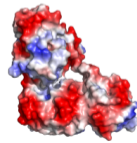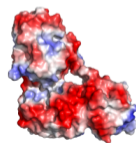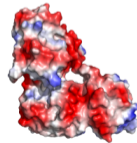

Acidic enrichment
