# Supplementary material for: Phylogenetically Driven Sequencing of Extremely Halophilic Archaea Reveals Strategies for Static and Dynamic Osmo-response
Source: PubMed Central journal article supplement (PMC4230888; doi:10.1371/journal.pgen.1004784), 2014-11-13
Supplement: pgen.1004784.s012.pdf [file pgen.1004784.s012.pdf]

|      |                         |                                         |
|------|-------------------------|-----------------------------------------|
| pred | Haloferax alexandrinus  | MVSMRSCMCCGEPISSETRHLCGVCIQNGCTSYADACGR |
| 4688 | Haloferax denitrificans | MGSMRSCMCCGEPISSETRHLCGVCIQNGCTSYADACGQ |
| 4688 | Haloferax gibonsii      | MVSMRSCMCCGEPISSETRHLCGVCIQNGCTSYADACGQ |
| 4688 | Haloferax lucentense    | MVSMRSCMCCGEPISSETRHLCGVCIQNGCTSYADACGQ |
| 4688 | Haloferax prahovense    | MVSMRSCMCCGEPISSETRHLCGVCIQNGCTSYADACGQ |
| 4688 | Haloferax sp_GUBF-1     | MVSMRSCMCCGEPISSETRHLCGVCIQNGCTSYADACGQ |
| 4688 | Haloferax sp_GUBF-2     | MVSMRSCMCCGEPISSETRHLCGVCIQNGCTSYADACGQ |
| 4688 | Haloferax sp_GUBF-3     | MVSMRSCMCCGEPISSETRHLCGVCIQNGCTSYADACGQ |
| pred | Haloferax sulfurifontis | MGSMRSCMCCGEPISSETRHLCGVCIQNGCTSYADACGQ |
| 4688 | Haloferax volcanii_DS2  | MVSMRSCMCCGEPISSETRHLCGVCIQNGCTSYADACGQ |
| 4688 | Haloferax volcanii      | MVSMRSCMCCGEPISSETRHLCGVCIQNGCTSYADACGQ |
| pred | Haloferax elongans      | MGELRTCLCCGAPVSKTRHLCGVCVQNGCTSYANACGQ  |
| 4688 | Haloferax larsenii      | MDESNTCLCCGAPVSKTRHLCGVCVQNGCTSYANVCGQ  |
| 4688 | Haloferax mediterranei  | MERPRSCMCCGAQISETRHLCGVCIQNGCTSYANICGQ  |
| 4688 | Haloferax mucosum       | MTRTRACMCCGATISDVRHLCGVCIQNGCTSYANTCGQ  |

. : \* : \* \* \* : \* . . \* \* \* \* \* \* : \* \* \* \* \* \* \* : \* \* :
