# Supplementary material for: Phylogenetically Driven Sequencing of Extremely Halophilic Archaea Reveals Strategies for Static and Dynamic Osmo-response
Source: PubMed Central journal article supplement (PMC4230888; doi:10.1371/journal.pgen.1004784), 2014-11-13
Supplement: pgen.1004784.s014.pdf [file pgen.1004784.s014.pdf]

- Halalkalicoccus jeotagii
- Halalkalicoccus jeotagii B3 DSM 18796
- Natronococcus amylolyticus
- Natronococcus jeotagii
- Halopiger xanaduensis
- Haloterrigena turkmenica
- Haloterrigena salina
- Natrinema gari
- Natrinema pallidum
- Natrinema altunense
- Natrinema versiforme
- Haloterrigena thermotolerans
- Natrinema pellirubrum
- Halovivax asiaticus
- Halobiforma lacticisai
- Natronobacterium gregoryi
- Halobiforma nitratireducens
- Haloterrigena limicola
- Natronorubrum bangense
- Natronorubrum sulfidifaciens
- Natronolimnobius innermongolicus
- Natronorubrum tibetense
- Natriaiba asiatica
- Natriaiba aegyptia
- Natriaiba taiwanensis
- Natriaiba magadii DSM 3394
- Natriaiba magadii
- Natriaiba chahannoensis
- Natriaiba hulunbeirensis
- Haloarcula marismortui
- Haloarcula sinaiensis
- Haloarcula californiae
- Haloarcula japonica
- Haloarcula vallismortis
- Haloarcula argentinensis
- Haloarcula amylolytica
- Halorubrum californiense
- Halorubrum arcis
- Halorubrum distributum JCM 10118
- Halorubrum distributum
- Halorubrum terrestre
- Halorubrum litoreum
- Halorubrum coriense
- Halorubrum hochstentium
- Halorubrum tebenquichense
- Halorubrum saccharovororum
- Halorubrum lacusprofundi
- Halorubrum kocurii
- Halorubrum aidingense
- Halorubrum lipolyticum
- Halococcus thailandensis
- Halococcus morrhuae
- Halococcus hamelinensis
- Halococcus salifodinae
- Halococcus saccharolyticus
- Halorhabdus utahensis
- Halosimplex carlsbadense
- Halomicrobium mukohataei
- Halobacterium R1
- Halobacterium NRC1
- Natronomonas pharaonis
- Haloquadratum walsbyi
- Haloferox voicanii DS2 DSM 3757
- Haloferox voicanii
- Haloferox sp GUBF-1
- Haloferox sp GUBF-3
- Haloferox sp GUBF-2
- Haloferox lucentense
- Haloferox alexandrinus
- Haloferox prahovense
- Haloferox gibonsii
- Haloferox sulfurifontis
- Haloferox denitrificans
- Haloferox elongans
- Haloferox larsenii
- Haloferox mucosum
- Haloferox mediterranei
- Halosarcina pallida
- Halogeometricum borinquense DSM 11551
- Halogeometricum borinquense

- \*1789, putative exonuclease RecJ\*
- \*1609, Mut/nudix family protein\*
- \*1771, Vng0579h\*
- \*1629, menaquinol--cytochrome-c reductase (cytochrome bc comp)
- \*1690, GO:0005506 db\_xref GO:0006118 db\_xref GO:0009055 produ
- \*1737, no annotation\*
- \*1738, no annotation\*
- \*1743, GO:0008121 product Ubiquinol--cytochrome c reductase,
- \*1722, no annotation\*
- \*1745, no annotation\*
- \*1744, no annotation\*
- \*1764, GO:0006457 db\_xref GO:0031072 db\_xref GO:0051082 produ
- \*1741, no annotation\*
- \*1742, no annotation\*
- \*1772, chaperone\*
- \*1653, probable menaquinol--cytochrome-c reductase (cytochrom
- \*1819, GO:0005506 db\_xref GO:0006118 db\_xref GO:0009055 produ
- \*1845, no annotation\*
- \*436, halocyanin precursor-like\*
- \*1844, no annotation\*
- \*1892, sulfite oxidase\*
