# Supplementary material for: Phylogenetically Driven Sequencing of Extremely Halophilic Archaea Reveals Strategies for Static and Dynamic Osmo-response
Source: PubMed Central journal article supplement (PMC4230888; doi:10.1371/journal.pgen.1004784), 2014-11-13
Supplement: pgen.1004784.s015.pdf [file pgen.1004784.s015.pdf]

Halalkalicoccus jeotagali  
Halalkalicoccus jeotagali B3 DSM 18796

Natronococcus amylolyticus

Natronococcus jeotagali

Halopiger xanaduensis

Haloterrigena turkmenica

Haloterrigena salina

Natrinema gari

Natrinema pallidum

Natrinema altunense

Natrinema versiforme

Haloterrigena thermotolerans

Natrinema pellirubrum

Halovivax asiaticus

Halobiforma lacisalsi

Natronobacterium gregoryi

Halobiforma nitratireducens

Haloterrigena limicola

Natronorubrum bangense

Natronorubrum sulfidifaciens

Natronolimnobius innermongolicus

Natronorubrum tibetense

Natrialba asiatica

Natrialba aegyptia

Natrialba taiwanensis

Natrialba magadii DSM 3394

Natrialba magadii

Natrialba chahannoensis

Natrialba hulunbeirensis

Haloarcula marismortui

Haloarcula sinaiensis

Haloarcula californiae

Haloarcula japonica

Haloarcula vallismortis

Haloarcula argentinensis

Haloarcula amylolytica

Halorubrum californiensis

Halorubrum arcis

Halorubrum distributum JCM 10118

Halorubrum distributum

Halorubrum terrestre

Halorubrum litoreum

Halorubrum coriense

Halorubrum hochstenium

Halorubrum tebenquichense

Halorubrum saccharovorum

Halorubrum lacusprofundi

Halorubrum kocurii

Halorubrum aidingense

Halorubrum lipolyticum

Halococcus thalassandensis

Halococcus morrhuae

Halococcus hamelinensis

Halococcus salifodinae

Halococcus saccharolyticus

Halorhabdus utahensis

Halosimplex carlsbadense

Halomicrobium mukohataei

Halobacterium R1

Halobacterium NRC1

Natronomonas pharaonis

Haloquadratum walsbyi

Haloferax volcanii DS2 DSM 3757

Haloferax volcanii

Haloferax sp GUBF-1

Haloferax sp GUBF-3

Haloferax sp GUBF-2

Haloferax lucentense

Haloferax alexandrinus

Haloferax prahovense

Haloferax gibonsii

Haloferax sulfurifontis

Haloferax denitrificans

Haloferax elongans

Haloferax larsenii

Haloferax mucosus

Haloferax mediterranei

Halosarcina pallida

Halogeometricum borinquense DSM 11551

Halogeometricum borinquense

.....  
\*1488, GO:0008152 db\_xref GO:0008168 product Cobalt-precorrin-3b C17-methyltransferase  
\*1447, GO:0030788 product Cobalt-precorrin-2 C20-methyltransferase (EC 2.1.1.130) [F  
\*1466, Cobalt-precorrin-6y C5-methyltransferase (EC 2.1.1.-)]  
\*1467, GO:0009236 product Cobalamin biosynthesis protein CbiG  
\*1471, GO:0046026 product Cobalt-precorrin-4 C11-methyltransferase (EC 2.1.1.133) [F  
\*1484, GO:0016993 product Cobalt-precorrin-8x methylmutase (EC 5.4.1.2) EC\_number !  
\*1485, Cobalt-precorrin-6y C15-methyltransferase [decarboxylating] (EC 2.1.1.-)  
\*1503, unknown protein confirmed by proteomics  
\*1504, GO:0016852 product Sirohydrochlorin cobaltochelataase (EC 4.99.1.3) Putative  
\*1505, conserved cobalamin operon protein  
\*1506, GO:0008152 db\_xref GO:0008168 product Cobalt-precorrin-3b C17-methyltransferase  
\*1527, CobN component of cobalt chelatase involved in B12 biosynthesis  
\*1548, ChlI component of cobalt chelatase involved in B12 biosynthesis / ChlD complex  
\*1594, Tup1 like transcriptional repressor  
\*1755, Vng1558h  
\*1801, cobalamin cluster protein  
\*1823, Predicted cobalt transporter CbtA  
\*1893, conserved cobalamin cluster protein CbiX 2 (probable ferredoxin-like iron-st
