# Supplementary material for: Phylogenetically Driven Sequencing of Extremely Halophilic Archaea Reveals Strategies for Static and Dynamic Osmo-response
Source: PubMed Central journal article supplement (PMC4230888; doi:10.1371/journal.pgen.1004784), 2014-11-13
Supplement: pgen.1004784.s019.pdf [file pgen.1004784.s019.pdf]

Halalkalicoccus jeotagli  
Halalkalicoccus jeotagali B3 DSM 18796  
Natronococcus amylolyticus  
Natronococcus jeotagli  
Halopiger xanaduensis  
Haloterrigena turkmenica  
Haloterrigena salina  
Natriinema gari  
Natriinema pallidum  
Natriinema altunense  
Natriinema versiforme  
Haloterrigena thermotolerans  
Natriinema pellirubrum  
Halovivax asiaticus  
Halobiforma lacticisali  
Natronobacterium gregoryi  
Halobiforma nitratireducens  
Haloterrigena limicola  
Natronorubrum bangense  
Natronorubrum sulfidifaciens  
Natronolimnobius innermongolicus  
Natronorubrum tibetense  
Natrialba asiatica  
Natrialba aegyptia  
Natrialba taiwanensis  
Natrialba magadii DSM 3394  
Natrialba magadii  
Natrialba chahannoensis  
Natrialba hulunbeirensis  
Haloarcula marismortui  
Haloarcula sinaiiensis  
Haloarcula californiae  
Haloarcula japonica  
Haloarcula vallismortis  
Haloarcula argentinensis  
Haloarcula amylolytica  
Halorubrum californiensis  
Halorubrum arcis  
Halorubrum distributum JCM 10118  
Halorubrum distributum  
Halorubrum terrestre  
Halorubrum litoreum  
Halorubrum coriense  
Halorubrum hochstenium  
Halorubrum tebenquichense  
Halorubrum saccharovororum  
Halorubrum lacusprofundi  
Halorubrum kocurii  
Halorubrum aidingense  
Halorubrum lipolyticum  
Halococcus thailandensis  
Halococcus morrhuae  
Halococcus hamelinensis  
Halococcus salifodinae  
Halococcus saccharolyticus  
Halorhabdus utahensis  
Halosimplex carlsbadense  
Halomicrobium mukohataei  
Halobacterium R1  
Halobacterium NRC1  
Natronomonas pharaonis  
Haloquadratum walsbyi  
Haloferax volcanii DS2 DSM 3757  
Haloferax volcanii  
Haloferax sp GUBF-1  
Haloferax sp GUBF-3  
Haloferax sp GUBF-2  
Haloferax lucentense  
Haloferax alexandrinus  
Haloferax prahovense  
Haloferax gibonsii  
Haloferax sulfurifontis  
Haloferax denitrificans  
Haloferax elongans  
Haloferax larsenii  
Haloferax mucosum  
Haloferax mediterranei  
Halosarcina pallida  
Halogeometricum borinquense DSM 11551  
Halogeometricum borinquense

\*2754, NifU-like domain protein\*

\*3345, no annotation\*

\*3642, nitrite/nitrate reduction protein\*
