# Supplementary material for: Phylogenetically Driven Sequencing of Extremely Halophilic Archaea Reveals Strategies for Static and Dynamic Osmo-response
Source: PubMed Central journal article supplement (PMC4230888; doi:10.1371/journal.pgen.1004784), 2014-11-13
Supplement: pgen.1004784.s021.pdf [file pgen.1004784.s021.pdf]

Halalkalicoccus jeotagli  
 Halalkalicoccus jeotgali B3 DSM 18796  
 Natronococcus amylolyticus  
 Natronococcus jeotagli  
 Halopiger xanaduensis  
 Haloterrigena turkmenica  
 Haloterrigena salina  
 Natrinema gari  
 Natrinema pallidum  
 Natrinema altunense  
 Natrinema versiforme  
 Haloterrigena thermotolerans  
 Natrinema pellirubrum  
 Halovivax asiaticus  
 Halobiforma lacisalsi  
 Natronobacterium gregoryi  
 Halobiforma nitratireducens  
 Haloterrigena limicola  
 Natronorubrum bangense  
 Natronorubrum sulfidifaciens  
 Natronolimnobius innermongolicus  
 Natronorubrum tibetense  
 Natrialba asiatica  
 Natrialba aegyptia  
 Natrialba taiwanensis  
 Natrialba magadii DSM 3394  
 Natrialba magadii  
 Natrialba chahannoensis  
 Natrialba hulunbeirensis  
 Haloarcula marismortui  
 Haloarcula sinaiensis  
 Haloarcula californiae  
 Haloarcula japonica  
 Haloarcula vallismortis  
 Haloarcula argentinensis  
 Haloarcula amylolytica  
 Halorubrum californiense  
 Halorubrum arcis  
 Halorubrum distributum JCM 10118  
 Halorubrum distributum  
 Halorubrum terrestre  
 Halorubrum litoreum  
 Halorubrum coriense  
 Halorubrum hochstenium  
 Halorubrum tebenquichense  
 Halorubrum saccharovorum  
 Halorubrum lacusprofundi  
 Halorubrum kocurii  
 Halorubrum aidingense  
 Halorubrum lipolyticum  
 Halococcus thailandensis  
 Halococcus morrhuae  
 Halococcus hamelinensis  
 Halococcus salifodinae  
 Halococcus saccharolyticus  
 Halorhabdus utahensis  
 Halosimplex carlsbadense  
 Halomicrobium mukohataei  
 Halobacterium R1  
 Halobacterium NRC1  
 Natronomonas pharaonis  
 Haloquadratum walsbyi  
 Haloferax volcanii DS2 DSM 3757  
 Haloferax volcanii  
 Haloferax sp GUBF-1  
 Haloferax sp GUBF-3  
 Haloferax sp GUBF-2  
 Haloferax lucentense  
 Haloferax alexandrinus  
 Haloferax prahovense  
 Haloferax gibonsii  
 Haloferax sulfurifontis  
 Haloferax denitrificans  
 Haloferax elongans  
 Haloferax larsenii  
 Haloferax mucosum  
 Haloferax mediterranei  
 Halosarcina pallida  
 Halogeometricum borinquense DSM 11551  
 Halogeometricum borinquense

\*2451, GO:0050304 product Nitrous-oxide reductase (EC 1.7.99.6) EC\_number 1.7.99.6"  
 \*2452, no annotation"  
 \*2467, Nitrous oxide reductase maturation transmembrane protein NosY"  
 \*2503, Nitrous oxide reductase maturation protein NosD"  
 \*2504, GO:0050304 product Nitrous-oxide reductase (EC 1.7.99.6) EC\_number 1.7.99.6"
