# Supplementary material for: Phylogenetically Driven Sequencing of Extremely Halophilic Archaea Reveals Strategies for Static and Dynamic Osmo-response
Source: PubMed Central journal article supplement (PMC4230888; doi:10.1371/journal.pgen.1004784), 2014-11-13

(A)

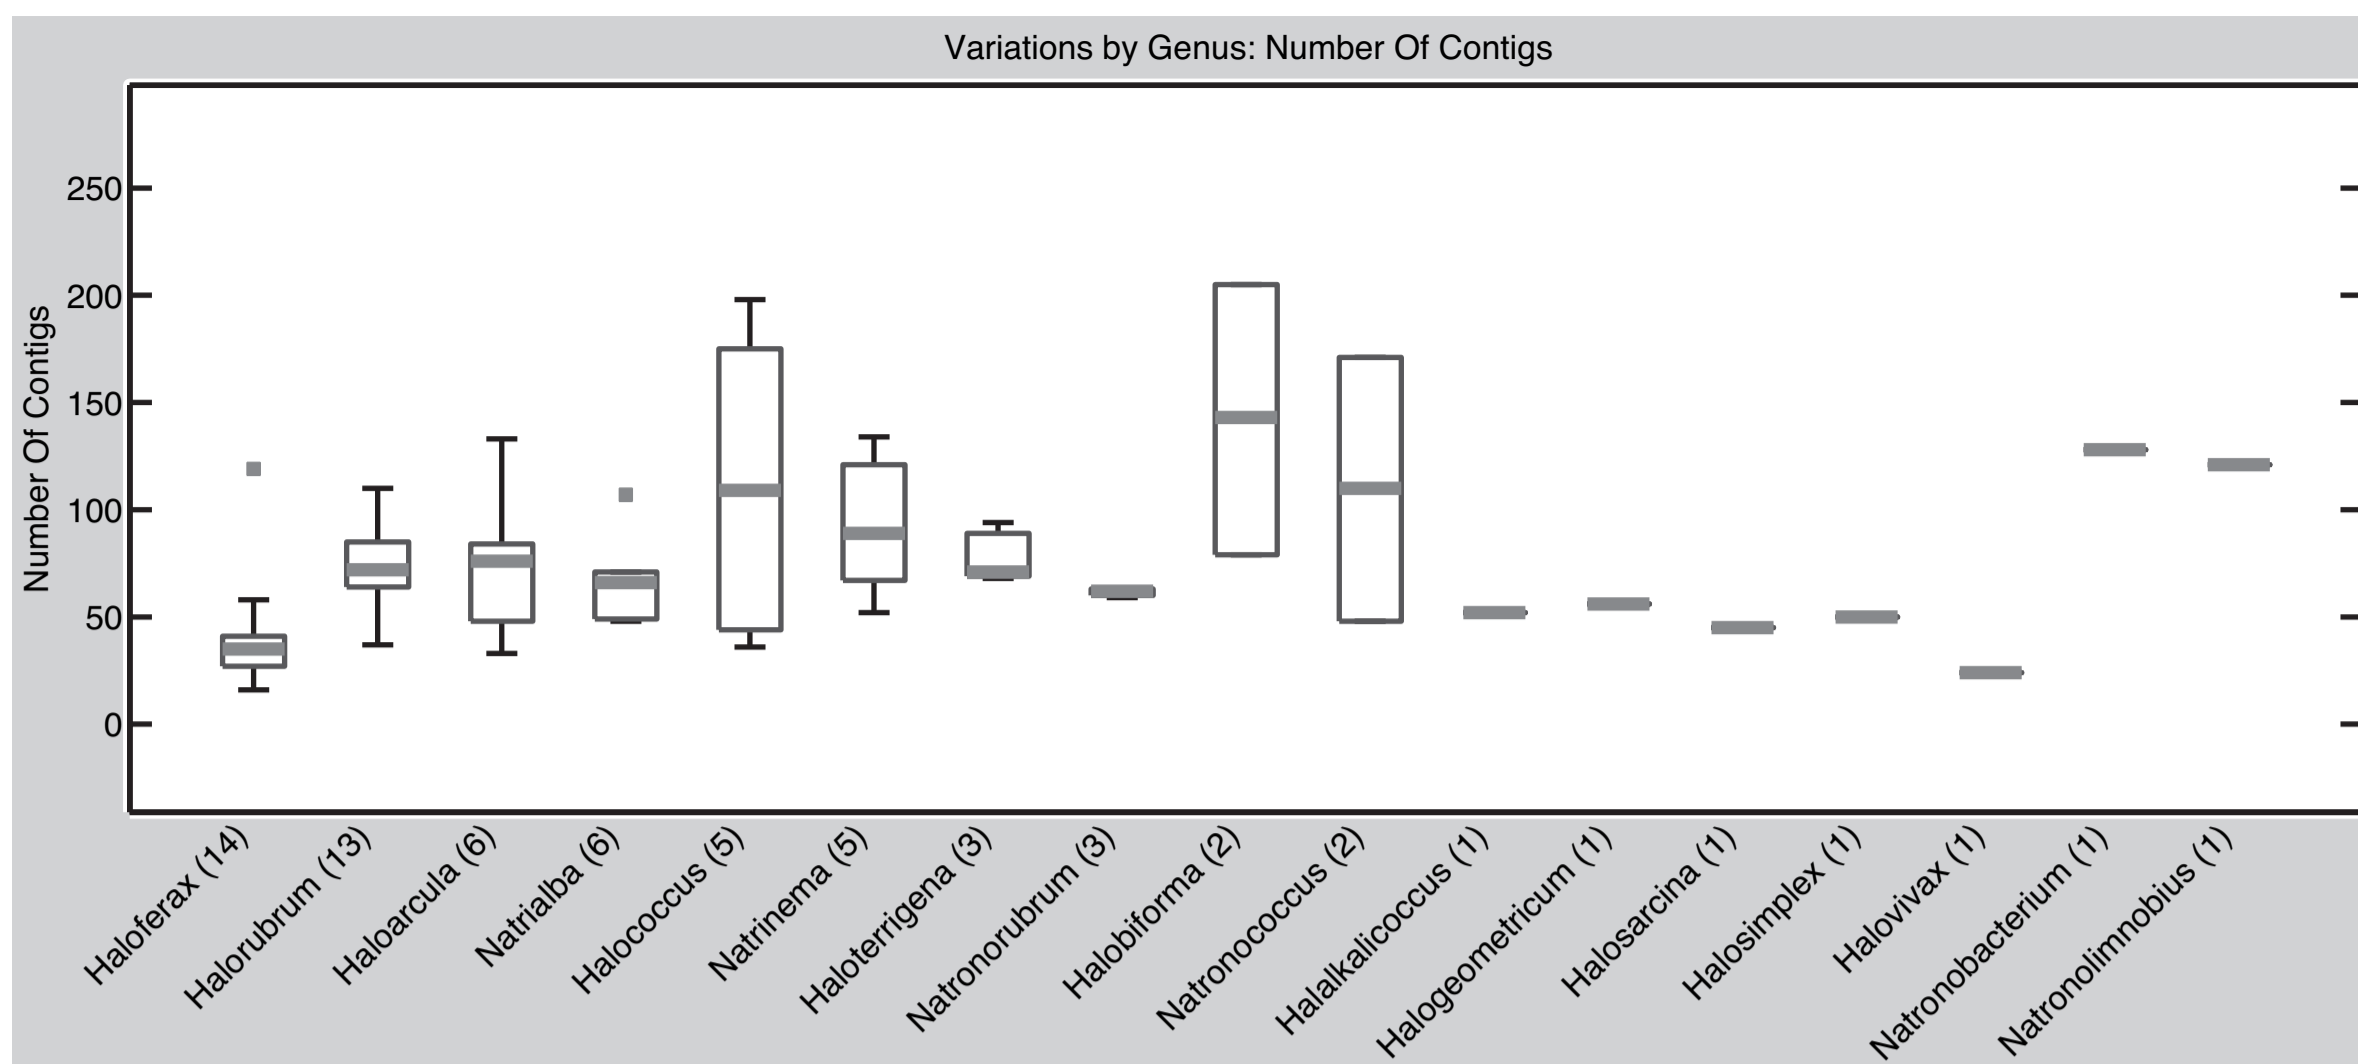

(B)

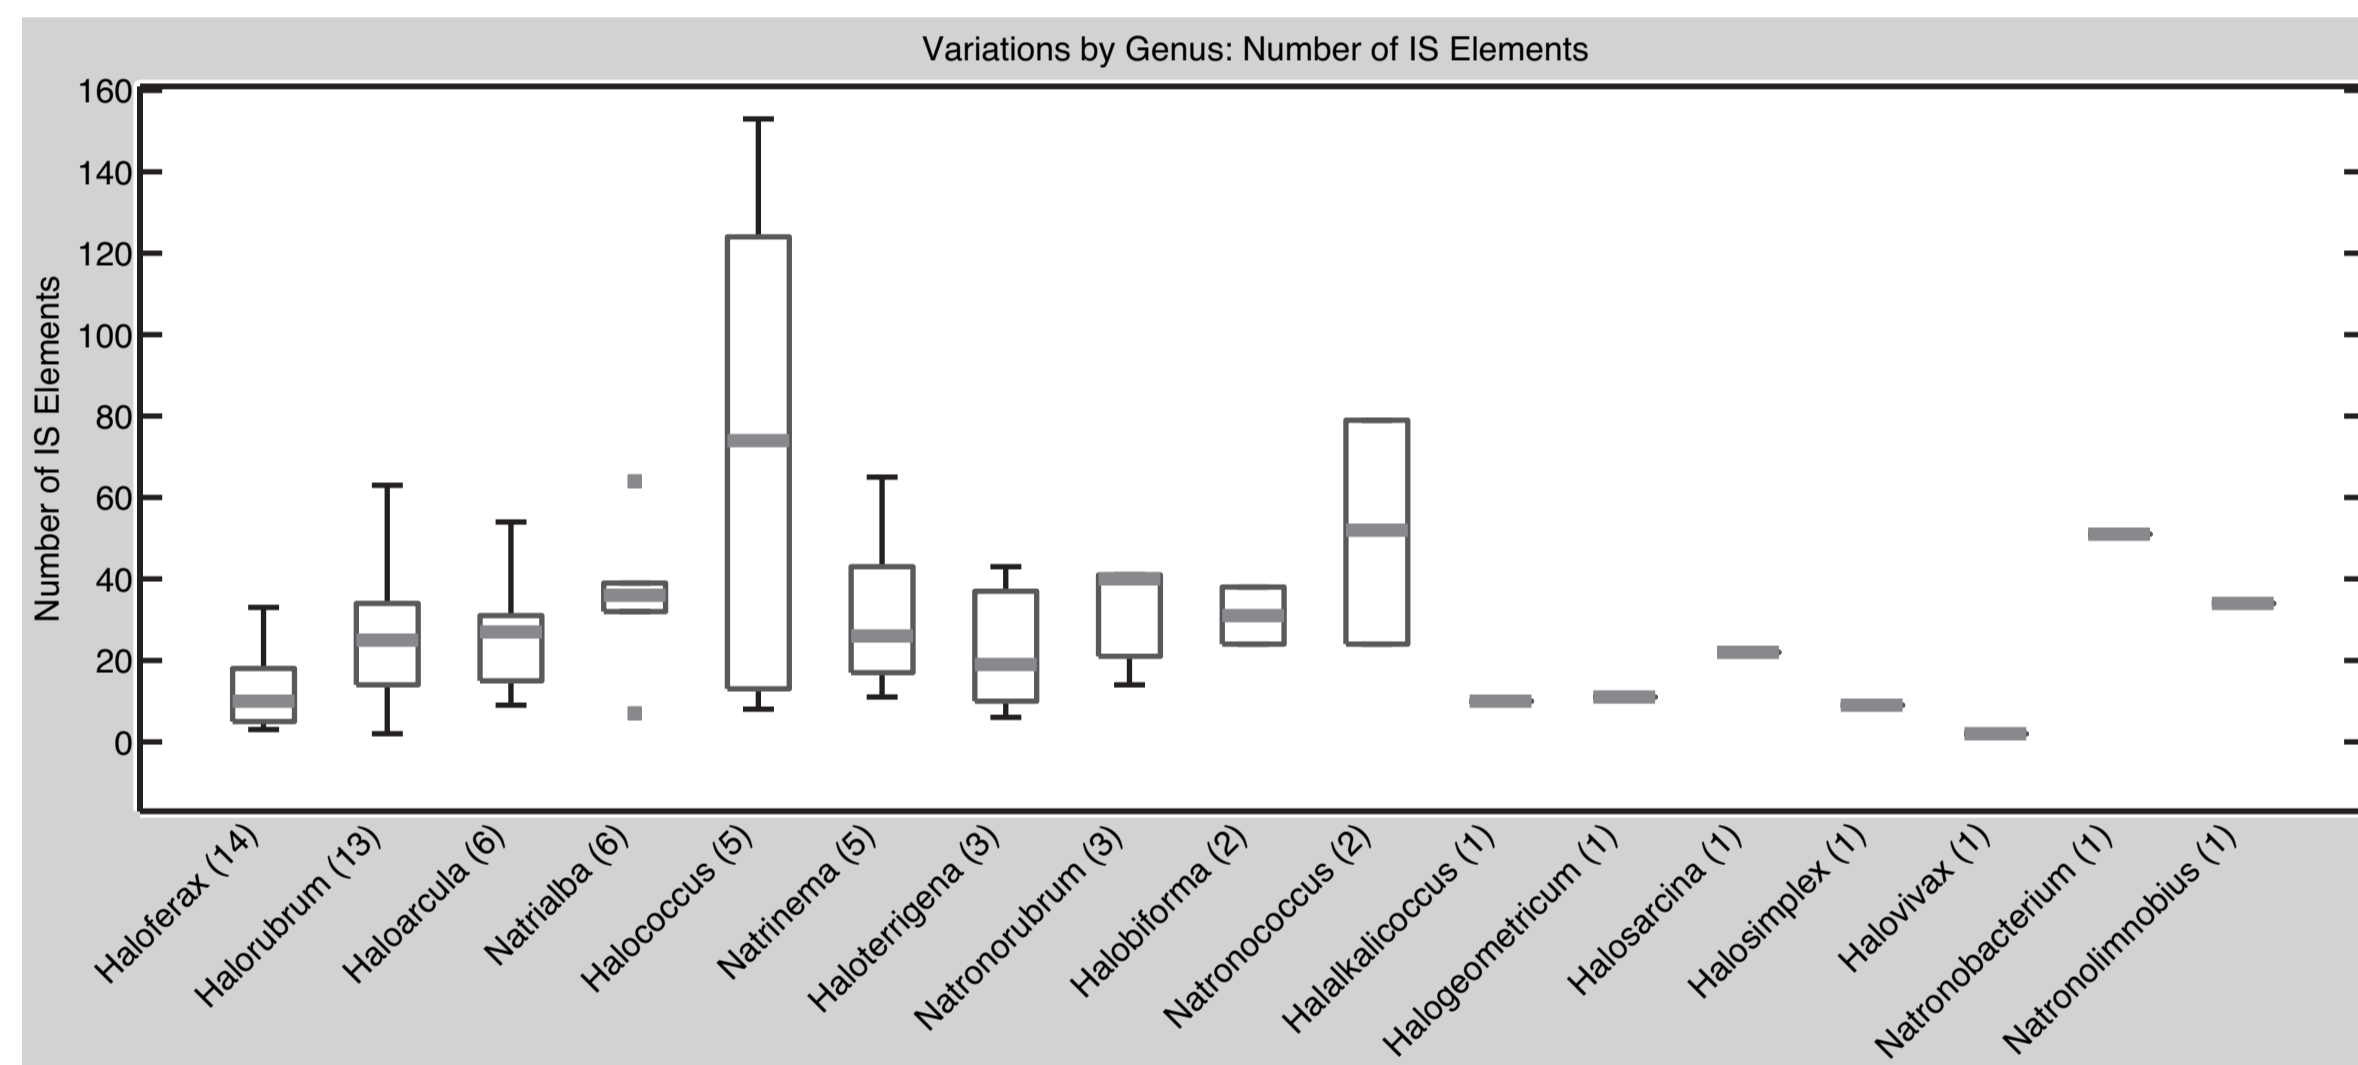

(C)

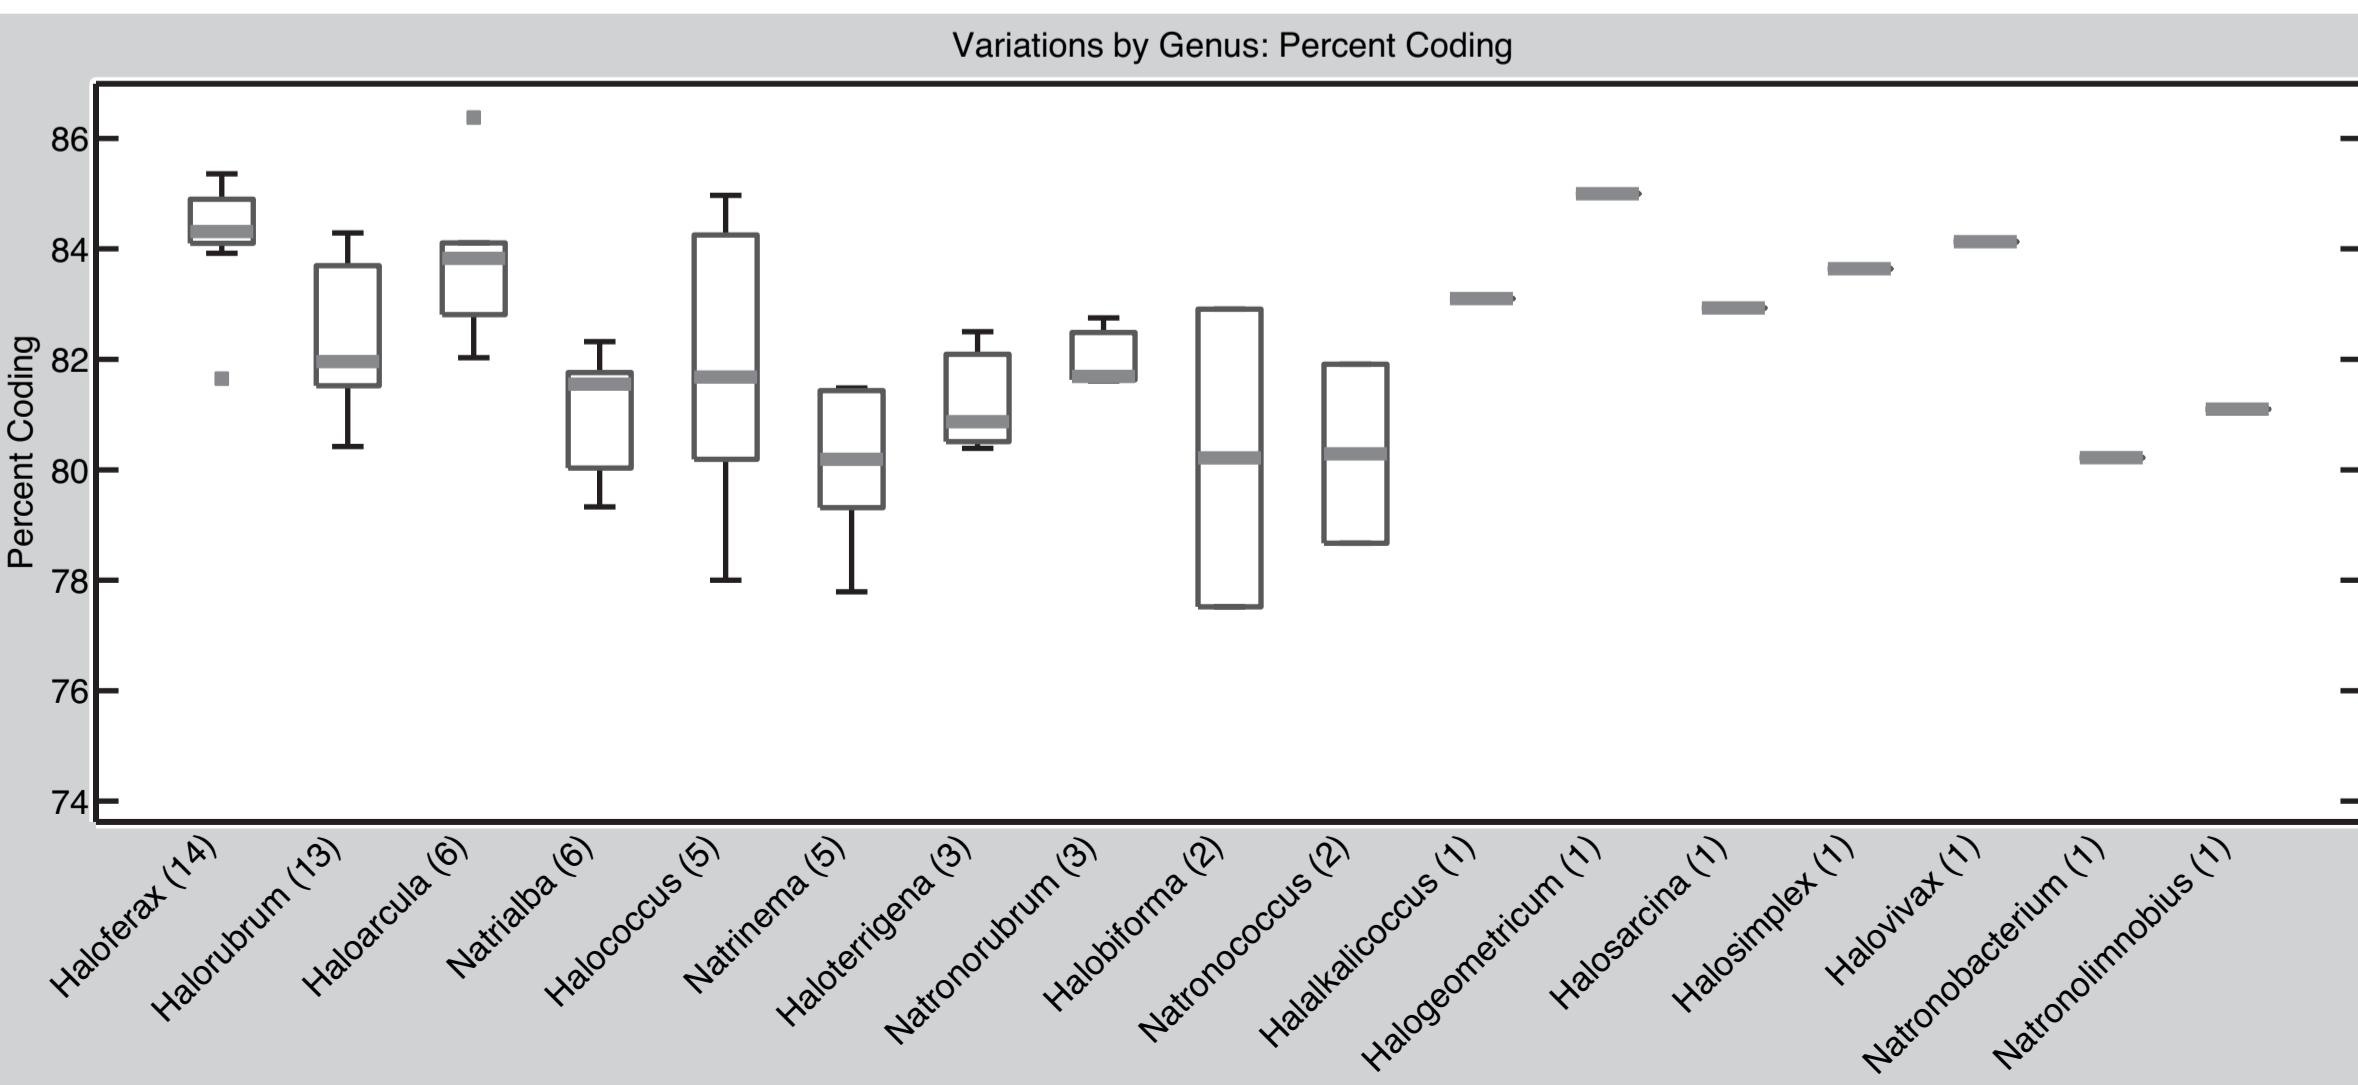

Supplement: pgen.1004784.s023.pdf [file pgen.1004784.s023.pdf]
