# Supplementary material for: Phylogenetically Driven Sequencing of Extremely Halophilic Archaea Reveals Strategies for Static and Dynamic Osmo-response
Source: PLoS Genet. 2014 Nov 13;10(11):e1004784. doi: 10.1371/journal.pgen.1004784 (PMC4230888; doi:10.1371/journal.pgen.1004784)
Supplement: Table S4 — Haloarchaeal core genome. (XLSX) [file pgen.1004784.s027.xlsx]

## Sheet: Sheet1
Transcription	TRIBE-MCL Cluster number
DNA-directed RNA polymerase subunit A' (EC 2.7.7.6)	780
DNA-directed RNA polymerase subunit B'' (EC 2.7.7.6)	781
DNA-directed RNA polymerase subunit D (EC 2.7.7.6)	708
DNA-directed RNA polymerase subunit E' (EC 2.7.7.6)	615
DNA-directed RNA polymerase subunit E''	464
DNA-directed RNA polymerase subunit K (EC 2.7.7.6)	704
DNA-directed RNA polymerase subunit N (EC 2.7.7.6)	705
DNA-directed RNA polymerase subunit P (EC 2.7.7.6)	751
conserved signal recognition particle operon protein/snoRNP protein GAR1 [rRNA processing]	688
Fibrillarin [rRNA processing]	677
TATA-box binding protein (TBP)	67
Transcription initiation factor B (TFB)	8
transcription initiation factor (TFB)	678
Transcriptional regulator, PadR family	14
Transcriptional regulator Trh3, AsnC family	655
NusA protein homolog, archaeal (transcription termination/antitermination L factor)	779
Putative transcription antitermination protein NusG	748
Transcription factor S	106
Archaeal heat shock transcriptional regulator, ArsR family	657
CBS domain protein, probable transcriptional regulator	741
Translation
SSU ribosomal protein SAe (S2p)	703
SSU ribosomal protein S2e (S5p)	645
SSU ribosomal protein S3e (S3p)	638
SSU ribosomal protein S9e (S4p)	710
SSU ribosomal protein S13e (S15p)	731
SSU ribosomal protein S14e (S11p)	709
SSU ribosomal protein S16e (S9p)	706
SSU ribosomal protein S18e (S13p)	711
SSU ribosomal protein S24e	627
SSU ribosomal protein S28e	699
LSU ribosomal protein L1e (L4p)	635
LSU ribosomal protein L3e (L3p)	634
LSU ribosomal protein L5e (L18p)	644
LSU ribosomal protein L7e (L30p)	646
LSU ribosomal protein L7Ae	700
LSU ribosomal protein L9e (L6p)	642
LSU ribosomal protein L10e (L16p)	783
LSU ribosomal protein L10Ae (L1p)	695
LSU ribosomal protein L13Ae (L13p)	707
LSU ribosomal protein L17e (L22p)	637
LSU ribosomal protein L19e	643
LSU ribosomal protein L23e (L14p)	640
LSU ribosomal protein L23Ae (L23p)	636
LSU ribosomal protein L26e (L24p)	641
LSU ribosomal protein L27Ae (L15p)	647
LSU ribosomal protein L31e	591
LSU ribosomal protein L35e (L29p)	639
LSU ribosomal protein P0 (L10p)	696
Ribosome biogenesis protein TSR3	621
Preprotein translocase subunit secY	294
Signal recognition particle, subunit Ffh SRP54	592
Translation initiation factor 1A	115
Translation initiation factor 2	630
Eukaryotic translation initiation factor 2 gamma subunit	616
Eukaryotic translation initiation factor 5A	651
Translation elongation factor 1 beta subunit	697
Translation elongation factor 2	777
DNA metabolism
A/G-specific adenine glycosylase (EC 3.2.2.-) [base excision repair]	720
DNA gyrase subunit A (EC 5.99.1.3)	732
DNA topoisomerase I (EC 5.99.1.2)	566
Endonuclease IV (EC 3.1.21.2)	551
Flap structure-specific endonuclease (EC 3.-.-.-)	690
helicase and uvrB	490
TP-dependent DNA helicase pcrA (EC 3.6.1.-)	454
Nucelotide metabolism
Adenylosuccinate lyase (EC 4.3.2.2) [purine metabolism; alanine, aspartate and glutamate metabolism]	556
Amidophosphoribosyltransferase (EC 2.4.2.14)	722
Diadenosine 5'5'''-P1,P4-tetraphosphate pyrophosphohydrolase [purine metabolism]	766
Dihydropyrimidinase (EC 3.5.2.2) and Dihydroorotase (EC 3.5.2.3)	200
dNTP triphosphohydrolase	176
GMP synthase (EC 6.3.5.2)	280
GMP synthase [glutamine-hydrolyzing], ATP pyrophosphatase subunit (EC 6.3.5.2) [purine metabolism]	656
IMP cyclohydrolase (EC 3.5.4.10) [alternate form]	580
Nucleoside diphosphate kinase (EC 2.7.4.6) [purine and pyrimidine metabolism]	698
Phosphoribosylglycinamide formyltransferase (EC 2.1.2.2) / Phosphoribosylaminoimidazolecarboxamide formyltransferase (EC 2.1.2.3)	764
Phosphoribosylamine--glycine ligase (EC 6.3.4.13)	680
Phosphoribosylaminoimidazole carboxylase ATPase subunit (EC 4.1.1.21) [purine metabolism]	477
tRNA metabolism
Cysteinyl-tRNA synthetase (EC 6.1.1.16) [aminoacyl-tRNA biosynthesis]	694
Glutamyl-tRNA(Gln) amidotransferase transferase subunit (EC 6.3.5.7) [aminoacyl-tRNA biosynthesis]	676
Methionyl-tRNA synthetase (EC 6.1.1.10) [aminoacyl-tRNA biosynthesis]	755
Prolyl-tRNA synthetase (EC 6.1.1.15), archaeal/eukaryal type [aminoacyl-tRNA biosynthesis]	763
Tryptophanyl-tRNA synthetase (EC 6.1.1.2) [aminoacyl-tRNA biosynthesis]	565
Tyrosyl-tRNA synthetase (EC 6.1.1.1) [aminoacyl-tRNA biosynthesis]	546
5-carboxymethyl uridine and 5-carboxymethyl 2-thiouridine methyltransferase [tRNA methylation]	733
tRNA cytosine methylase Pos56 [tRNA methylation]	735
tRNA m5C48-49 methylase [tRNA methylation]	745
tRNA N2,N2-dimethyl(Guanine26-N2)-methyltransferase (EC 2.1.1.32) [tRNA methylation]	608
YgjD/Kae1/Qri7 family, required for N6-threonylcarbamoyl adenosine t(6)A37 modification in tRNA / p53-regulating protein kinase (human PRPK/yeast YGR262c) [tRNA modification]	626
Cell cycle
Cell division protein FtsH (EC 3.4.24.-)	34
Cell division protein FtsH (EC 3.4.24.-)	742
Cell division protein FtsH (EC 3.4.24.-) and AAA-type ATPase	620
Cell division protein FtsJ / Ribosomal RNA large subunit methyltransferase (EC 2.1.1.-) [fusion protein]	601
CBS/parB domain-containing protein	334
conserved primase operon protein	673
DNA polymerase sliding clamp protein PCNA	259
Replication factor A (ssDNA-binding protein)	785
replication factor A homolog	320
Replication factor C large subunit	662
Amino acid metabolism
3-hydroxybutyryl-CoA dehydrogenase (EC 1.1.1.157) and 3-hydroxyacyl-CoA dehydrogenase (EC 1.1.1.35) [phenylalanine metabolism; valine, leucine and isoleucine degradation; lysine degradation; tryptophan metabolism; fatty acid metabolism] [fusion protein]	100
Argininosuccinate synthase (EC 6.3.4.5) [alanine, aspartate and glutamate metabolism; arginine and proline metabolism]	522
Archaeal S-adenosylmethionine synthetase (EC 2.5.1.6) [cysteine and methionine metabolism]	542
Aspartate carbamoyltransferase regulatory chain (PyrI) [Pyrimidine metabolism; alanine, aspartate and glutamate metabolism]	682
Aspartate aminotransferase (EC 2.6.1.1) and Biosynthetic Aromatic amino acid aminotransferase alpha (EC 2.6.1.57) [amino acid metabolism]	27
Aspartate-semialdehyde dehydrogenase (EC 1.2.1.11) [glycine, serine and threonine metabolism; cysteine and methionine metabolism; lysine biosynthesis]	668
Anthranilate synthase, aminase component (EC 4.1.3.27) [phenylalanine, tyrosine and tryptophan biosynthesis]	612
Aspartokinase (EC 2.7.2.4) [glycine, serine and threonine metabolism; cysteine and methionine metabolism; lysine biosynthesis]	579
CDP-diacylglycerol--serine O-phosphatidyltransferase (EC 2.7.8.8) [Glycine, serine and threonine metabolism]	730
Chorismate mutase I (EC 5.4.99.5) [phenylalanine, tyrosine and tryptophan biosynthesis]	725
Chorismate synthase (EC 4.2.3.5) [phenylalanine, tyrosine and tryptophan biosynthesis]	686
conserved tyrA operon protein [tyrosine metabolism]	684
Creatinine amidohydrolase (EC 3.5.2.10) [arginine and proline metabolism]	37
glutamate dehydrogenase (EC 1.4.1.2) (EC 1.4.1.3) (EC 1.4.1.4) [alanine, aspartate and glutamate metabolism; arginine and proline metabolism]	40
Glutathione S-transferase, omega (EC 2.5.1.18)	406
Indole-3-glycerol phosphate synthase (EC 4.1.1.48) [phenylalanine, tyrosine and tryptophan biosynthesis]	774
Iron-sulfur cluster assembly ATPase protein SufC (part of cysteine desulfurase complex)	744
Iron-sulfur cluster assembly protein SufD (part of cysteine desulfurase complex)	743
O-acetylhomoserine sulfhydrylase (EC 2.5.1.49) O-succinylhomoserine sulfhydrylase (EC 2.5.1.48) and Cystathionine gamma-lyase (EC 4.4.1.1) [cysteine and methionine metabolism]	33
Ornithine carbamoyltransferase (EC 2.1.3.3) [arginine and proline metabolism]	521
Phosphoribosylanthranilate isomerase (EC 5.3.1.24) [phenylalanine, tyrosine and tryptophan biosynthesis]	613
Prephenate and/or arogenate dehydrogenase (unknown specificity) (EC 1.3.1.12)(EC 1.3.1.43) [phenylalanine, tyrosine and tryptophan biosynthesis]	685
Serine hydroxymethyltransferase (EC 2.1.2.1) [glycine, serine and threonine metabolism]	230
Threonine dehydratase (EC 4.3.1.19) [glycine, serine and threonine metabolism; valine, leucine and isoleucine biosynthesis]	69
Threonine synthase (EC 4.2.3.1) [glycine, serine and threonine metabolism]	291
Threonine synthase (EC 4.2.3.1) [glycine, serine and threonine metabolism]	195
Tryptophan synthase alpha chain (EC 4.2.1.20) [glycine, serine and threonine metabolism; phenylalanine, tyrosine and tryptophan biosynthesis]	775
Tryptophan synthase beta chain (EC 4.2.1.20) [glycine, serine and threonine metabolism; phenylalanine, tyrosine and tryptophan biosynthesis]	177
Co-factor metabolism
3-ketoacyl-CoA thiolase and Acetyl-CoA acetyltransferase	26
Molybdopterin biosynthesis protein MoeA	485
Molybdopterin-guanine dinucleotide biosynthesis protein MobB	625
Molybdenum cofactor biosynthesis protein MoaC	724
GTP cyclohydrolase I (EC 3.5.4.16) type 2 [folate biosynthesis]	611
Methylenetetrahydrofolate dehydrogenase (NADP+) (EC 1.5.1.5) / Methenyltetrahydrofolate cyclohydrolase (EC 3.5.4.9) [one carbon pool by folate]	312
DNA-binding HTH domain in riboflavin kinase / CTP-dependent archaeal riboflavin kinase [flavin mononucleotide biosynthesis]	525
Glutamate--cysteine ligase archaeal (EC 6.3.2.2) [glutathione metabolism]	541
Glutaredoxin-related protein [glutathione utilization]	767
NAD synthetase (EC 6.3.1.5) [nicotinate and nicotinamide metabolism]	119
Nicotinate phosphoribosyltransferase (EC 2.4.2.11) [nicotinate and nicotinamide metabolism]	512
GTP cyclohydrolase III (EC 3.5.4.29) [riboflavin metabolism]	362
Naphthoate synthase (EC 4.1.3.36) [isoprenoid-quinone biosynthesis]	562
1,4-dihydroxy-2-naphthoate octaprenyltransferase (EC 2.5.1.74) [isoprenoid-quinone biosynthesis]	544
Ubiquinone biosynthesis monooxygenase UbiB	210
Thiamine-monophosphate kinase (EC 2.7.4.16) [thiamine metabolism]	624
Cysteine desulfurase (EC 2.8.1.7) [thiamine metabolism]	523
Protein-L-isoaspartate O-methyltransferase (EC 2.1.1.77) and SAM-dependent methyltransferase DSY4148 (UbiE paralog) [SAM metabolism]	782
24-sterol C-methyltransferase and homolog 6 to S-adenosylmethionine-dependent methyltransferase 3 (EC 2.1.1.-) [SAM metabolism]	576
Ubiquinone/menaquinone biosynthesis methyltransferase UbiE (EC 2.1.1.-) [SAM metabolism]	771
Carbohydrate metabolism
Acetyl-coenzyme A synthetase (EC 6.2.1.1)	25
Acetyl-coenzyme A synthetase (EC 6.2.1.1)	11
Fe-S protein, homolog of lactate dehydrogenase SO1521 [glycolysis/gluconeogenesis]	52
L-lactate dehydrogenase (EC 1.1.1.27) and Malate dehydrogenase (EC 1.1.1.37) [Glycolysis/gluconeogenesis; TCA cycle]	290
Succinate dehydrogenase hydrophobic membrane anchor protein [TCA cycle]	713
Succinate dehydrogenase cytochrome b subunit [TCA cycle]	714
Fumarate hydratase class II (EC 4.2.1.2) [TCA cycle]	675
2-oxoglutarate oxidoreductase, alpha subunit (EC 1.2.7.3) [TCA cycle]	92
Succinyl-CoA ligase [ADP-forming] beta chain (EC 6.2.1.5) [TCA cycle]	666
Succinyl-CoA ligase [ADP-forming] alpha chain (EC 6.2.1.5) [TCA cycle]	665
Succinate dehydrogenase iron-sulfur protein (EC 1.3.99.1) [TCA cycle; oxidative phosphorylation]	433
NADH dehydrogenase (EC 1.6.99.3) [oxidative phosphorylation]	140
NADH-ubiquinone oxidoreductase chain H (EC 1.6.5.3) [oxidative phosphorylation]	476
NADH-ubiquinone oxidoreductase chain N (EC 1.6.5.3) [oxidative phosphorylation]	531
NADH-ubiquinone oxidoreductase chain M (EC 1.6.5.3) [oxidative phosphorylation]	738
NADH-ubiquinone oxidoreductase chain L (EC 1.6.5.3) [oxidative phosphorylation]	739
NADH-ubiquinone oxidoreductase chain K (EC 1.6.5.3) [oxidative phosphorylation]	740
Nucleoside-diphosphate-sugar epimerases [galactose metabolism]	770
NADP-dependent malic enzyme (EC 1.1.1.40) [pyruvate metabolism]	193
Imidazole glycerol phosphate synthase cyclase subunit (EC 4.1.3.-) [pyruvate metabolism]	518
Lipid metabolism
Glycosyltransferase (EC 2.4.1.-) [sphingolipid metabolism]	772
Long-chain-fatty-acid--CoA ligase (EC 6.2.1.3) [fatty acid metabolism]	746
short chain dehydrogenase (EC 1.1.1.100) [fatty acid biosynthesis; biotin metabolism]	209
Mevalonate kinase (EC 2.7.1.36) [isoprenoid biosynthesis]	702
Undecaprenyl pyrophosphate synthetase (EC 2.5.1.31) [isoprenoid biosynthesis]	533
Octaprenyl-diphosphate synthase (EC 2.5.1.-) / Dimethylallyltransferase (EC 2.5.1.1) / Geranyltranstransferase (EC 2.5.1.10) / Geranylgeranyl pyrophosphate synthetase (EC 2.5.1.29) [isoprenoid biosynthesis]	524
Diphosphomevalonate decarboxylase (EC 4.1.1.33) [isoprenoid biosynthesis]	505
Geranylgeranyl/isoprenyl reductase [isoprenoid biosynthesis]	555
Pantoate kinase, archaeal (EC 2.7.1.-) [isoprenoid biosynthesis]	437
Isopentenyl phosphate kinase [mevalonate pathway]	701
Sulfur metabolism
Sulfate adenylyltransferase subunit 2 (EC 2.7.7.4)	251
Thiosulfate sulfurtransferase, rhodanese (EC 2.8.1.1)	182
Stress proteins
cold shock protein	22
Heat shock protein 60 family chaperone GroEL / Thermosome subunit	35
Heat shock protease HtpX( EC:3.4.24.- )	78
stress protein with UspA domain	1
stress response protein	649
DNA mismatch repair protein MutS	104
DNA mismatch repair protein MutL	199
DNA repair and recombination protein RadA	590
DNA repair and recombination protein RadB	628
DNA damage-inducible protein and Na(+)/drug antiporter	114
Transporters
ABC transport protein (substrate unknown)	2
ABC transport protein (substrate unknown)	6
ABC transport protein (substrate unknown)	7
ABC transport protein, ATP-binding component (substrate unknown)	95
ABC transport protein, ATP-binding component (probable substrates dipeptide/oligopeptide/nickel)	13
ABC transport protein, permease component (probable substrates dipeptide/oligopeptide/nickel)	12
ABC transport protein, ATP-binding component (probable substrates glutamine/glutamate/polar amino acids/ branched-chain amino acids/tungstate/phosphate/sugars)	28
ABC transport protein, ATP-binding component (probable substrates dipeptide/oligopeptide)	45
ATPase (probable substrates copper/lead/cadmium/zinc/mercury)	16
amino acid transporter	53
Probable low-affinity inorganic phosphate transporter	63
Probable low-affinity inorganic phosphate transporter	105
Phosphate transport system regulatory protein PhoU	116
probable transport system regulatory protein (probable substrate phosphate)	354
Kef-type K+ transport systems (NAD-binding component fused to domain related to exopolyphosphatase)	96
Permease of the drug/metabolite transporter (DMT) superfamily	19
FIG000605: protein co-occurring with transport systems (COG1739)	458
major facilitator superfamily transporter	386
Other
Porphobilinogen deaminase (EC 2.5.1.61) [porphyrin and chlorophyll metabolism]	573
Glutamate-1-semialdehyde aminotransferase (EC 5.4.3.8) [porphyrin and chlorophyll metabolism]	184
Cob(I)alamin adenosyltransferase PduO (EC 2.5.1.17) [porphyrin and chlorophyll metabolism]	664
Glutamyl-tRNA reductase (EC 1.2.1.70) [porphyrin and chlorophyll metabolism]	401
peroxiredoxin and Alkyl hydroperoxide reductase subunit C-like protein [antioxidant]	602
Alkyl hydroperoxide reductase and/or thiol-specific antioxidant family (AhpC/TSA) protein [antioxidant]	540
Acetylspermidine deacetylase (EC 3.5.1.48) Deacetylases, including yeast histone deacetylase and acetoin utilization protein [spermidine synthesis]	315
MoxR-like ATPase [methanol dehydrogenase regulatory protein]	29
twitching mobility (PilT) related protein and predicted ATPase and KH domain-containing protein MJ1533	760
diptheria toxin resistance protein required for diphthamide biosynthesis (Saccharomyces)-like 1	726
O-succinylbenzoate-CoA synthase (EC 4.2.1.-) [biosynthesis of type II polyketide backbone]	563
Collagen alpha 1(I) chain precursor	721
RNase L inhibitor	423
archaeal histone A1	786
Only general function known
acetyltransferase	769
probable acetyltransferase	672
aminopeptidase	75
aminopeptidase	306
CBS domain protein (Vng1663c)	228
dehydrogenase/oxidoreductase (substrate unknown)	3
DNA-binding protein MTH1615	623
GTP-binding and nucleic acid-binding protein YchF	110
GTP-binding protein	578
RIO-like serine/threonine protein kinase (EC 2.7.11.1)	610
Serine protein kinase (prkA protein), P-loop containing	716
surface glycoprotein precursor	692
COG1836 (predicted membrane protein)	653
metalloprotease	272
Predicted RNA methylase COG2263	727
COG2106 Methylase	633
phosphoesterase	585
rhomboid family protein/intramembrane serine protease (EC 3.4.21.-)	421
rhomboid family protein/GlpG-like protein and Vng0361c (intramembrane protease)	747
Putative RNA-binding protein COG1094	609
COG3269, Predicted RNA-binding protein, contains TRAM domain	56
putative Zn-dependent hydrolase and metallo-beta-lactamase	282
Unknown function
hypothetical protein (Vng2591c)	58
hypothetical protein (Vng2519h)	788
hypothetical protein (Vng2515h)	789
hypothetical protein	152
hypothetical protein (Vng2656h)	778
hypothetical protein (Vng0419c)	765
hypothetical protein (Vng2643h)	761
hypothetical protein	225
hypothetical protein (Vng0351c)	768
hypothetical protein (Vng2608c)	759
hypothetical protein (Vng0240c)	752
hypothetical protein	283
hypothetical protein (Vng0759h)	736
hypothetical protein	554
hypothetical protein	586
hypothetical protein (Vng1409c)	718
hypothetical protein (Vng1410h)	719
hypothetical protein (Vng1086c)	693
hypothetical protein (Vng1360h)	689
hypothetical protein (Vng1300h)	681
hypothetical protein	617
hypothetical protein (Vng1611c)	663
hypothetical protein (Vng1874c)	659
hypothetical protein	618
hypothetical protein	622
hypothetical protein (Vng1998h)	629
hypothetical protein	652
hypothetical protein	654
hypothetical protein	679
hypothetical protein (Vng2154c)	596
hypothetical protein (Vng0393c)	597
hypothetical protein	717
hypothetical protein (Vng1381h)	588
hypothetical protein	737
hypothetical protein (FIG00796636, DUF1119, Vng1365c)	543
hypothetical protein (Vng1263c)	369
hypothetical membrane protein (FIG00434354, FIG00593332, FIG028593)	371
hypothetical protein (Vng1088c, FIG00796301)	303
hypothetical protein	750
hypothetical protein (Vng0768h)	260
hypothetical protein	762
hypothetical protein	784
hypothetical protein (Vng0671h)	89
hypothetical protein (Vng0601h)	734
Uncharacterized protein MJ0187	581
Uncharacterized protein MJ0068 (Vng1264c)	449
Uncharacterized protein MJ0213	683
COG2047: Uncharacterized protein (ATP-grasp superfamily)	402
A. fulgidus predicted coding region AF1182	577
hypothetical protein, possibly Long-chain-fatty-acid--CoA ligase (EC 6.2.1.3)	535
UPF0218 protein MJ0395	614
tetratricopeptide repeat protein	412
ACT-domain-containing protein, predicted allosteric regulator of homoserine dehydrogenase	337
PRC-barrel domain posible photosystem reaction centre subunit H	293
HTR-like protein and Uncharacterized protein MJ0480 and Vng0834c and conserved adk/cmk cluster protein	253
Ambiguous (multiple unrelated annotations)
Beta-lactamase related protein [Penicillin and cephalosporin biosynthesis] and hydrolase (probable hydroxyacylglutathione hydrolase)(EC 3.1.2.6) [pyruvate metabolism]	445
Glucose-1-phosphate thymidylyltransferase (EC 2.7.7.24)[Streptomycin biosynthesis] and Mannose-1-phosphate guanylyltransferase (EC 2.7.7.13) [Fructose and mannose metabolism]	266
Anthranilate synthase, amidotransferase component (EC 4.1.3.27) [phenylalanine, tyrosine and tryptophan biosynthesis] and Para-aminobenzoate synthase, amidotransferase component (EC 2.6.1.85) [folate biosynthesis]	81
Atrazine chlorohydrolase (EC 3.8.1.8) [atrazine degradation] and Formiminoglutamic iminohydrolase (EC 3.5.3.13) [histidine metabolism] and N-ethylammeline chlorohydrolase and S-adenosylhomocysteine deaminase (EC 3.5.4.28)	66
Hydroxyacylglutathione hydrolase (EC 3.1.2.6) [pyruvate metabolism] and thiosulfate sulfurtransferase (EC 2.8.1.1) [sulfur metabolism]	38
UDP-glucose 4-epimerase (EC 5.1.3.2) [galactose metabolism] and dTDP-glucose 4,6-dehydratase (EC 4.2.1.46) [antibiotic biosynthesis]	24
dihydrodipicolinate synthase (EC 4.2.1.52) [lysine biosynthesis] and 2-dehydro-3-deoxyphosphogluconate aldolase (EC 4.1.2.14) [Pentose phosphate pathway; arginine and proline metabolism]	86
4-hydroxybenzoate 3-monooxygenase (EC 1.14.13.2) [benzoate degradation] and electron-transferring-flavoprotein dehydrogenase (EC 1.5.5.1) [ubiquinol biosynthesis]	669
