# Supplementary material for: Phylogenetically Driven Sequencing of Extremely Halophilic Archaea Reveals Strategies for Static and Dynamic Osmo-response
Source: PLoS Genet. 2014 Nov 13;10(11):e1004784. doi: 10.1371/journal.pgen.1004784 (PMC4230888; doi:10.1371/journal.pgen.1004784)
Supplement: Table S5 — Protein families with high pI members. (XLSX) [file pgen.1004784.s028.xlsx]

## Sheet: Sheet1
Product	Number w/pI >=7.5	Total number	Fraction with high pI
DNA-directed RNA polymerase subunit P	66	66	1
50S ribosomal protein L14P	66	66	1
50S ribosomal protein L15e	66	66	1
50S ribosomal protein L10e	66	66	1
50S ribosomal protein L2P	66	66	1
50S ribosomal protein L39e	66	66	1
50S ribosomal protein L44e	66	66	1
30S ribosomal protein S8e	66	66	1
50S ribosomal protein L37e	65	65	1
30S ribosomal protein S12P	65	65	1
cobalt transport protein	41	41	1
50S ribosomal protein L40e	40	40	1
cobalt transporter	30	30	1
cytochrome oxidase assembly	27	27	1
putative iron-III ABC transporter permease	22	22	1
ribosomal protein L40e	21	21	1
DnaJ domain-containing protein	16	16	1
putative cobalt ABC transporter permease	14	14	1
NADH dehydrogenase-like complex subunit A	13	13	1
VanZ family protein	12	12	1
divalent cation transporter domain-containing protein	12	12	1
50S ribosomal protein L37a.eR	12	12	1
sulfate ABC transporter permease	11	11	1
ATPase, Class I, type 8B, member 2	10	10	1
putative sulfate/tungstate ABC transporter permease	10	10	1
putative drug/metabolite exporter family protein permease	10	10	1
MFS transporter, phthalate permease	10	10	1
YeeE/YedE family protein family	10	10	1
LysE type translocator	10	10	1
ribonuclease P protein component 4	10	10	1
ABC-type transport system involved in multi-copper enzyme maturation, permease component	9	9	1
tryptophan-rich sensory protein	9	9	1
TspO/MBR family protein	9	9	1
multidrug-efflux transporter	8	8	1
Integral membrane protein domain protein	7	7	1
multidrug efflux protein variant	7	7	1
ribosomal protein S14.2	7	7	1
cobalt ABC transporter permease cbiq	6	6	1
ferrichrome ABC transporter permease	6	6	1
ABC-type copper transport system, permease protein	6	6	1
lycopene cyclase	6	6	1
agl cluster protein AglR	6	6	1
putative polysaccharide biosynthesis protein	6	6	1
sugar and other transporter	6	6	1
RNAse P Rpr2/Rpp21 subunit	6	6	1
metallopeptidase	6	6	1
thiamine ABC transporter permease	5	5	1
FeoA family protein	5	5	1
intramembrane serine protease	5	5	1
cobalt transport protein CbiM	4	4	1
molybdenum ABC transporter permease protein	4	4	1
ABC transporter ATP-binding protein-like protein	4	4	1
Brp-like protein-like	4	4	1
putative CDP-diacylglycerol--glycerol-3-phosphate 3-phosphatidyl-transferase	4	4	1
rhomboid family protein/intramembrane serine protease	4	4	1
MFS transporter	4	4	1
GtrA-like family protein, cell surface polysaccharide biosynthesis protein	4	4	1
membrane metallopeptidase	4	4	1
iron/cobalamin ABC transporter permease	3	3	1
spermidine/putrescine ABC transporter permease protein	3	3	1
heme exporter protein C	3	3	1
histone family protein DNA-binding protein	3	3	1
ABC-type branched-chain amino acid transport system, permease protein I	3	3	1
branched-chain amino acid ABC transporter permease I	3	3	1
putative ABC-type phosphate transport system permease	3	3	1
putative IS1341-type transposase	3	3	1
predicted protease of the Abi (CAAX) family protein	3	3	1
50S ribosomal protein L40	3	3	1
cytochrome-c-aa3 oxidase assembly factor CtaA	3	3	1
CbiQ protein ( ABC-type cobalt transport system permease protein 1)	2	2	1
ABC-type iron(III) transport system, permease protein	2	2	1
iron(III) ABC transporter permease	2	2	1
ABC-type Fe3+ transport system, permease component	2	2	1
ABC-type copper transport system involved in multi-copper enzyme maturation, permease	2	2	1
putative nos system protein, ABC-type copper transport system, permease protein	2	2	1
opsin	2	2	1
branched chain amino acid ABC transporter inner membrane protein	2	2	1
Phage integrase family domain-containing protein	2	2	1
ABC-type phosphate transport system permease component	2	2	1
ISH9-type transposase ISHwa1	2	2	1
putative ABC transporter ATP-binding protein	2	2	1
putative sodium/phosphate symporter	2	2	1
transfer complex protein N-terminal part-like protein	2	2	1
drug/metabolite family transporter	2	2	1
LSU ribosomal protein l37ae	2	2	1
ribonuclease p protein subunit rpp21	2	2	1
putative intramembrane serine protease	2	2	1
2-polyprenyl-6-methoxyphenol 4-hydroxylase	1	1	1
4-hydroxybenzoate polyprenyltransferase-like prenyltransferase	1	1	1
ABC-type dipeptide/oligopeptide/nickel transport system, permease I	1	1	1
ABC-2 type transport system integral membrane protein	1	1	1
ABC transporter membrane subunit	1	1	1
sugar ABC transporter inner membrane protein	1	1	1
enolase superfamily enzyme related to L-alanine- DL-glutamate epimerase	1	1	1
magnesium-transporting P-type ATPase	1	1	1
membrane associated protein	1	1	1
Cobalamin synthase	1	1	1
cytochrome c biogenesis protein, transmembrane region	1	1	1
putative ISH4 transposase	1	1	1
small putative GAF containing sensor	1	1	1
malate dehydrogenase (oxaloacetate-decarboxylating)(NADP+)	1	1	1
pH adaptation potassium efflux system protein G (sodium-potassium/hydrogen antiporter subunit G)	1	1	1
Sodium:neurotransmitter symporter family protein, putative	1	1	1
sodium:proline symporter	1	1	1
NADH dehydrogenase, subunit A (ubiquinone)	1	1	1
NADH-quinone oxidoreductase subunit 5-like protein	1	1	1
bacteriorhodopsin-related protein	1	1	1
copper resistance protein	1	1	1
cytochrome C biogenesis protein transmembrane region/thiol-disulfide transporter	1	1	1
ferredoxin subunit of nitrite reductase and ring- hydroxylating dioxygenase	1	1	1
gas-vesicle operon protein gvpI	1	1	1
GDSL-like lipase/acylhydrolase domain-containing protein	1	1	1
Immunoglobulin G binding protein A precursor	1	1	1
lon-b peptidase	1	1	1
putative capsule polysaccharide biosynthesis protein, integral membrane protein	1	1	1
putative transport protein, chloride channel	1	1	1
sialic acid synthase (N-acetylneuraminate synthase) (N-acetylneuraminic acid synthase) (N-acetylneuraminate-9-phosphate synthase) (N-acetylneuraminic acid phosphate synthase)	1	1	1
signal transduction histidine kinase LytS	1	1	1
thiol:disulfide interchange protein	1	1	1
drug/metabolite family transporter 23	1	1	1
drug/metabolite family transporter 24	1	1	1
major facilitator superfamily permease	1	1	1
oxalate/formate antiporter	1	1	1
TcaB protein	1	1	1
transport protein	1	1	1
CDP-diacylglycerol--glycerol-3-phosphate 3-phosphatidyl-transferase	1	1	1
putative phosphatidyltransferase	1	1	1
family 2 glycosyltransferase	1	1	1
LSU ribosomal protein l40e	1	1	1
sec-independent protein translocase (tatc)	1	1	1
transcription initiation factor TFB 7	1	1	1
IS240-type transposase (ISH103)	1	1	1
CP4-6 prophage; IS5 transposase and trans-activator	1	1	1
C4-dicarboxylate transport system permease small protein	1	1	1
UDP-3-o-(3-hydroxymyristoyl) glucosamine n-acyltransferase	1	1	1
divalent divalent cation tolerance protein	1	1	1
ste24-type metalloprotease	1	1	1
30S ribosomal protein S17e	69	70	0.985714
GtrA family protein	46	47	0.978723
succinate dehydrogenase subunit D	64	66	0.969697
50S ribosomal protein L21e	64	66	0.969697
cytochrome aa3 controlling protein	22	23	0.956522
phosphonates ABC transporter permease protein	21	22	0.954545
transporter, major facilitator family subfamily protein	17	18	0.944444
bacteriorhodopsin-like protein	16	17	0.941176
transposase (ISH4)	14	15	0.933333
nitrite/nitrate reduction protein	12	13	0.923077
Fjo21	12	13	0.923077
NifC-like ABC-type porter	11	12	0.916667
putative transposase (ISH9)	11	12	0.916667
rhomboid-like intramembrane serine protease	10	11	0.909091
Mg2+ transporter	9	10	0.9
VIT family protein	9	10	0.9
RNAse P, Rpr2/Rpp21 subunit	44	49	0.897959
30S ribosomal protein S9P	59	66	0.893939
AN1-type Zinc finger protein	14	16	0.875
transposase (ISH9)	18	21	0.857143
alkanonic acid methyltransferase	12	14	0.857143
ABC-type transport system permease protein 2 (heme exporter protein C)	6	7	0.857143
Beta-carotene 15,15'-monooxygenase, Brp/Blh family protein	6	7	0.857143
sulfate transport system permease	11	13	0.846154
TspO and MBR like protein	15	18	0.833333
transporter possibly hexose	10	12	0.833333
potential NADH-quinone oxidoreductase subunit 5	5	6	0.833333
membrane protein involved in the export of O-antigen and teichoic acid	19	23	0.826087
acyltransferase 3	9	11	0.818182
phosphoesterase PA-phosphatase-related protein	31	38	0.815789
sn-glycerol-3-phosphate transport system permease	22	27	0.814815
putative peptidase	8	10	0.8
TspO and MBR-like protein	8	10	0.8
Fe3 -siderophore ABC transporter permease	4	5	0.8
auxin efflux carrier (AEC) family protein	4	5	0.8
transporter of the drug/metabolite transporter (DMT) superfamily protein	4	5	0.8
ribonuclease p protein subunit rpp14	4	5	0.8
ISH4-type transposase	19	24	0.791667
30S ribosomal protein S14P	53	67	0.791045
50S ribosomal protein L19e	52	66	0.787879
Insertion element protein	22	28	0.785714
ISH9-type transposase ISHwa3	47	60	0.783333
sodium-dependent phosphate transporter	28	36	0.777778
dipeptide ABC transporter permease	14	18	0.777778
sodium/phosphate symporter	7	9	0.777778
sugar ABC transport system permease protein	10	13	0.769231
crcB protein-like protein	10	13	0.769231
MFS permease	10	13	0.769231
threonine/homoserine/homoserine lactone efflux protein	13	17	0.764706
branched chain amino acid transporter permease protein	9	12	0.75
ABC transporter permease protein	6	8	0.75
SPW repeat protein	6	8	0.75
cysteine transporter	3	4	0.75
MFS permease (drug)	3	4	0.75
putative DMT superfamily transporter	3	4	0.75
nickel-cobalt-cadmium resistance protein; NccN	3	4	0.75
Camphor resistance CrcB protein	20	27	0.740741
heat shock protein X	8	11	0.727273
major facilitator superfamily MFS1	5	7	0.714286
threonine efflux protein	5	7	0.714286
ABC-type dipeptide/oligopeptide/nickel transport system, permease protein I	7	10	0.7
phosphate ABC transporter inner membrane subunit PstA	7	10	0.7
ISH9-type transposase	51	75	0.68
integral membrane protein	22	33	0.666667
ABC-3 protein	8	12	0.666667
molybdenum ABC transporter permease	4	6	0.666667
Fe3+-siderophore ABC transporter permease	2	3	0.666667
sulfate/thiosulfate/molybdate ABC transporter permease	2	3	0.666667
NosY protein	2	3	0.666667
Penicillinase repressor	2	3	0.666667
Na+/phosphate symporter	2	3	0.666667
NADH dehydrogenase-like complex, subunit A	2	3	0.666667
putative acyltransferase	2	3	0.666667
transport protein (drug/metabolite family transporter)	2	3	0.666667
ribosomal protein S17e	2	3	0.666667
iron ABC transporter permease	22	34	0.647059
phosphonate ABC transporter inner membrane subunit	11	17	0.647059
putative membrane-bound metal-dependent hydrolase	50	79	0.632911
drug resistance transporter, Bcr/CflA subfamily protein	10	16	0.625
multidrug resistance protein-like protein	10	16	0.625
amino acid transport protein	5	8	0.625
major facilitator family multidrug efflux transporter	5	8	0.625
putative MFS transporter	8	13	0.615385
50S ribosomal protein L37Ae	8	13	0.615385
multidrug ABC transporter	11	18	0.611111
glucose-6-phosphatase	15	25	0.6
VanZ like family protein	6	10	0.6
rhomboid family protein/GlpG-like protein	3	5	0.6
transporter component	3	5	0.6
ribosomal protein S10-like protein	3	5	0.6
polysaccharide biosynthesis protein	146	245	0.595918
PA-phosphatase-like phosphoesterase	41	69	0.594203
transporter permease	35	59	0.59322
HtpX protease-like protein	16	27	0.592593
putative transposase	55	93	0.591398
Zn-ribbon RNA-binding protein	39	66	0.590909
disulfide bond formation protein DsbB	13	22	0.590909
cobalt ABC transporter permease	20	34	0.588235
Integral membrane protein superfamily	14	24	0.583333
ABC-type dipeptide/oligopeptide/nickel transport system, permease protein II	7	12	0.583333
integrase catalytic subunit	16	28	0.571429
Ion channel family protein	8	14	0.571429
O-antigen polymerase	8	14	0.571429
cytochrome c-type biogenesis protein CcdA	4	7	0.571429
GtrA-like family protein	10	18	0.555556
SpoIVFB-type metallopeptidase	10	18	0.555556
ISH4 transposase	12	22	0.545455
ABC transporter ATPase	6	11	0.545455
export protein	14	26	0.538462
putative branched-chain amino acids ABC transporter permease	34	64	0.53125
fla cluster protein FlaD	11	21	0.52381
SWIM zinc finger domain-containing protein	10	20	0.5
amino acid ABC transporter permease	6	12	0.5
succinoglycan biosynthesis transport protein	6	12	0.5
putative IS240-type transposase (ISH103)	6	12	0.5
DnaJ-class molecular chaperone with C-terminal Zn finger domain	5	10	0.5
phosphate ABC transporter, inner membrane subunit PstA	4	8	0.5
padR like DNA binding protein	4	8	0.5
sensory rhodopsin I	3	6	0.5
glycosyl transferase, group 1 family protein	3	6	0.5
catalytic domain of components of various dehydrogenase complexes	3	6	0.5
ABC-type transport system permease protein (probable substrate dipeptides/oligopeptides)	2	4	0.5
transport system permease protein	2	4	0.5
ABC-type transport system involved in multi-copper enzyme maturation permease component	2	4	0.5
dolichol kinase	2	4	0.5
formate hydrogenlyase subunit 3/multisubunit Na+/H+ antiporter subunit MnhD	2	4	0.5
LysE family transporter	2	4	0.5
NADH:ubiquinone oxidoreductase subunit 3 (chain a)	2	4	0.5
IS1341-type transposase (nonfunctional,N-terminal part)	2	4	0.5
RNA polymerase sigma factor	2	4	0.5
transcription initiation factor IIB 5	2	4	0.5
putative ABC transporter	1	2	0.5
ABC-type spermidine/putrescine transport system, permease component I	1	2	0.5
putative fructose-amino acid permease	1	2	0.5
ABC transporter involved in multi-copper enzyme maturation, permease component	1	2	0.5
putative integral membrane transporter	1	2	0.5
transposase protein	1	2	0.5
glycosyltransferase (group 1)	1	2	0.5
membrane protein involved in the export of o- antigen and teichoic acid	1	2	0.5
PA-phosphatase like phosphoesterase	1	2	0.5
ATPase involved in replication control Cdc46/Mcm family-like protein	1	2	0.5
cytochrome d ubiquinol oxidase subunit 2	1	2	0.5
high-affinity nickel-transporter	1	2	0.5
ISH9-type transposase (nonfunctional, C-terminal part)	1	2	0.5
pap2 superfamily protein	1	2	0.5
transcription factor pcc1	1	2	0.5
xylan esterase	1	2	0.5
Y414 protein	1	2	0.5
Type IV secretory pathway VirD4 protein-like protein	1	2	0.5
ISH4-type transposase ISHwa6	1	2	0.5
transposase IS4 family protein	117	244	0.479508
copper ABC transporter permease	33	69	0.478261
RNA polymerase Rpb6	11	23	0.478261
phosphoesterase PA-phosphatase-like protein	29	61	0.47541
high-affinity branched-chain amino acid transport protein	8	17	0.470588
corrinoid ABC transporter permease	31	66	0.469697
phosphonate ABC transporter permease	15	32	0.46875
rhomboid family protein	56	120	0.466667
dipeptide/oligopeptide/nickel ABC transporter permease	14	30	0.466667
DedA family protein	14	30	0.466667
acetoacetate decarboxylase	6	13	0.461538
putative protease	6	13	0.461538
camphor resistance protein CrcB	9	20	0.45
DNA damage-inducible protein	16	36	0.444444
cell division inhibitor MinD-like protein	7	16	0.4375
sugar transporter	40	92	0.434783
cytochrome c biogenesis protein transmembrane region	23	53	0.433962
branched-chain amino acid transport	16	37	0.432432
ISH8-type transposase	6	14	0.428571
NAD(P)H-quinone oxidoreductase subunit 3	3	7	0.428571
arabinose efflux permease family protein	3	7	0.428571
major facilitator family hexuronate transporter	3	7	0.428571
peptidase M48 Ste24p	42	99	0.424242
putative carotenoid biosynthesis protein	5	12	0.416667
ABC-type transport system permease	31	75	0.413333
phosphoribose diphosphate:decaprenyl-phosphate phosphoribosyltransferase	2	5	0.4
ABC-type transport system, involved in lipoprotein release, permease component	2	5	0.4
multidrug ABC transporter permease	2	5	0.4
mvp-type potassium channel superfamily protein	2	5	0.4
hemerythrin HHE cation binding domain-containing protein	2	5	0.4
ribonuclease P subunit P14	2	5	0.4
H/ACA RNA-protein complex component Nop10p	26	66	0.393939
HTTM domain protein	13	33	0.393939
ABC-type transport system permease protein	11	29	0.37931
transporter	43	114	0.377193
sulfite oxidase	15	40	0.375
phosphate/sulfate permease	9	24	0.375
major facilitator superfamily MFS_1	64	171	0.374269
NADH dehydrogenase subunit K (ubiquinone)	4	11	0.363636
membrane-flanked domain protein	33	92	0.358696
major facilitator superfamily protein	173	485	0.356701
spermidine/putrescine ABC transporter permease	11	31	0.354839
CrcB protein	11	31	0.354839
heat shock protein DnaJ domain-containing protein	12	34	0.352941
binding-protein-dependent transport systems inner membrane component	76	217	0.35023
NADH-ubiquinone/plastoquinone oxidoreductase chain 3	14	41	0.341463
transposase (ISH3)	21	62	0.33871
membrane-bound metal-dependent hydrolase	109	324	0.33642
transmembrane protein	7	21	0.333333
CDP-diacylglycerol--serine O-phosphatidyltransferase	7	21	0.333333
arabinose efflux permease	5	15	0.333333
membrane-bound metal-dependent hydrolase (duf457)	3	9	0.333333
peptidase M10A and M12B matrixin and adamalysin	2	6	0.333333
phosphatidylserine/phosphatidylglycerophosphate/cardiolipin synthase	2	6	0.333333
SPW repeat-containing protein	2	6	0.333333
iron(III ABC transporter permease ABC transporter permease	1	3	0.333333
Cyanate transport protein cynX	1	3	0.333333
type II secretion system protein/archaeal flagella assembly protein J	1	3	0.333333
site-specific integrase/recombinase	1	3	0.333333
polysaccharide biosynthesis transporter	1	3	0.333333
transport protein 56 ( polysaccharide biosynthesis transport protein)	1	3	0.333333
membrane anion transport protein	1	3	0.333333
branched-chain amino acid ABC transporter	1	3	0.333333
ERCC4 domain-containing protein	1	3	0.333333
sporulation control protein	1	3	0.333333
mannosyltransferase	1	3	0.333333
metal-binding protein-like protein	1	3	0.333333
CAAX amino protease	1	3	0.333333
resolvase-like protein	1	3	0.333333
UDP-3-O-[3-hydroxymyristoyl] glucosamine N-acyltransferase	1	3	0.333333
MarR family regulator	1	3	0.333333
ABC transporter permease	81	244	0.331967
putative dipeptides/oligopeptides ABC transporter permease	26	79	0.329114
putative sugar transporter	11	34	0.323529
30S ribosomal protein S10	11	34	0.323529
ABC-2 type transporter	41	127	0.322835
protoheme IX farnesyltransferase	18	57	0.315789
branched-chain/neutral amino acids ABC transporter permease	5	16	0.3125
CDP-diacylglycerol--glycerol-3-phosphate 3-phosphatidyltransferase	7	23	0.304348
30S ribosomal protein S11P	20	66	0.30303
arylsulfatase A family protein	10	33	0.30303
sodium symporter	9	30	0.3
IS200-type transposase	6	20	0.3
beta-D-glucosidase	3	10	0.3
dnaj-class molecular chaperone with c-terminal zn finger domain	3	10	0.3
Bat-like protein	3	10	0.3
solute carrier family 5 (low affinity glucose cotransporter), member 4-like protein	3	10	0.3
sugar phosphate permease	3	10	0.3
binding-protein-dependent transporters inner membrane component	103	344	0.299419
ABC-type dipeptide/oligopeptide/nickel transport system, permease component	10	34	0.294118
putative integral membrane protein	10	34	0.294118
phosphate transporter	52	179	0.290503
heat shock protein HtpX	40	138	0.289855
30S ribosomal protein S5P	19	66	0.287879
transposase ISH51	4	14	0.285714
Excinuclease ABC C subunit domain protein	4	14	0.285714
putative 2-component system sensor kinase	2	7	0.285714
trk-type k+ transporter, membrane component	2	7	0.285714
cytochrome C biogenesis protein transmembrane region	15	53	0.283019
IS240-type transposase (ISH102)	10	36	0.277778
TRAP dicarboxylate transporter subunit DctM	5	18	0.277778
heat shock protein DnaJ domain protein	14	51	0.27451
transposase IS200-family protein	14	51	0.27451
Zinc finger TFIIB-type domain protein	3	11	0.272727
CRCB integral membrane protein	4	15	0.266667
CAAX amino terminal protease family protein	18	68	0.264706
transposase (ISH1)	9	34	0.264706
efflux protein, mate family	5	19	0.263158
pH adaptation potassium efflux system protein A	6	23	0.26087
major facilitator superfamily transporter	19	74	0.256757
phosphoesterase PA-phosphatase related protein	11	43	0.255814
abortive infection protein	30	118	0.254237
membrane protein	19	75	0.253333
peptide ABC transporter permease	39	155	0.251613
DMT(drug/metabolite transporter) superfamily permease	13	52	0.25
Bacteriorhodopsin	7	28	0.25
Brp-like protein	4	16	0.25
YapH protein	3	12	0.25
zinc ABC transporter permease	2	8	0.25
2-component system sensor kinase	2	8	0.25
swim zinc finger-containing protein	2	8	0.25
30S ribosomal protein S14	2	8	0.25
branched-chain amino acid ABC transporter permease II	1	4	0.25
ABC-type nitrate/sulfonate/bicarbonate transport system, permease component	1	4	0.25
ABC-type spermidine/putrescine transport system, permease component II	1	4	0.25
Alanyl-tRNA synthetase, class IIc-like protein	1	4	0.25
amino acid/amide ABC transporter membrane protein 1, haat family	1	4	0.25
MATE family drug/sodium antiporters	1	4	0.25
major facilitator superfamily MFS 1	12	49	0.244898
UbiA prenyltransferase	11	45	0.244444
cobalamin biosynthesis protein CobD	15	65	0.230769
17 kDa surface antigen	3	13	0.230769
preprotein translocase subunit SecE	15	66	0.227273
50S ribosomal protein L18e	15	66	0.227273
cytochrome c biogenesis protein	5	22	0.227273
cytochrome C biogenesis protein	5	22	0.227273
transposase	107	473	0.226216
RDD domain-containing protein	9	40	0.225
oligopeptide ABC transporter permease	4	18	0.222222
Na+/Ca2+-antiporter-like protein	2	9	0.222222
metal-dependent phosphoesterase, php family protein	2	9	0.222222
MATE efflux family protein	51	230	0.221739
transposase, IS605 OrfB family protein	75	344	0.218023
caax amino terminal protease	5	23	0.217391
IS1341-type transposase	39	182	0.214286
putative phage integrase	3	14	0.214286
NADH dehydrogenase-like complex subunit K	3	14	0.214286
sodium-and chloride-dependent transporter	4	19	0.210526
CDP-alcohol phosphatidyltransferase	23	114	0.201754
preprotein translocase subunit SecG	13	65	0.2
camphor resistance protein crcb	4	20	0.2
glutamate/valine-rich protein	4	20	0.2
ABC transporter integral membrane subunit	3	15	0.2
Ion transport 2 domain-containing protein	2	10	0.2
Rz1 protein precursor-related protein	2	10	0.2
vanz like family protein	2	10	0.2
transposase ISHwa16_A	2	10	0.2
peptidase A24B, FlaK domain-containing protein	2	10	0.2
Zeaxanthin epoxidase	1	5	0.2
polar amino acid ABC transporter inner membrane protein	1	5	0.2
N-acylneuraminate cytidylyltransferase	1	5	0.2
flagella assembly protein j	1	5	0.2
NAD-binding protein 1 ( Kef-type transporter subunit)	1	5	0.2
ComEC/Rec2-related domain-containing protein	1	5	0.2
enoyl-CoA hydratase/carnithine racemase	1	5	0.2
nucleic acid-binding protein, contains PIN domain	1	5	0.2
major facilitator superfamily transporter quinolone resistance protein	1	5	0.2
membrane protein/domain	1	5	0.2
Pirin domain protein	1	5	0.2
Fe-Mn family superoxide dismutase	1	5	0.2
sugar ABC transporter permease	82	417	0.196643
putative transport protein	5	26	0.192308
transposase, is605 orfb family, central region	8	42	0.190476
ABC transporter integral membrane protein	21	111	0.189189
molecular chaperone DnaJ	3	16	0.1875
brp-like protein	3	16	0.1875
peptidase	6	33	0.181818
cytochrome c-type biogenesis protein	4	22	0.181818
Na+/Ca2+ antiporter, CaCA family protein	2	11	0.181818
transposase (ISH16)	2	11	0.181818
branched-chain amino acid ABC transporter permease	27	150	0.18
HTTM domain-containing protein	7	39	0.179487
IS1341-type transposase (TCE32)	12	67	0.179104
NADH/Ubiquinone/plastoquinone	8	45	0.177778
inner-membrane translocator	39	221	0.176471
menaquinol--cytochrome-c reductase (cytochrome bc complex) cytochrome b/c subunit	3	17	0.176471
glycine/betaine ABC transporter substrate-binding protein	3	17	0.176471
ribosomal L37ae protein	5	29	0.172414
peptidyl-tRNA hydrolase	11	66	0.166667
FUN14 family protein	6	36	0.166667
NADH dehydrogenase (quinone)	5	30	0.166667
Mn2+ and Fe2+ transporter-like protein	3	18	0.166667
DMT (drug/metabolite family transporter) superfamily permease	3	18	0.166667
tyrosyl-DNA phosphodiesterase	2	12	0.166667
transport system permease	1	6	0.166667
branched-chain amino acid ABC transporter permease protein	1	6	0.166667
K+dependent Na+ exchanger related-protein	1	6	0.166667
snf family na+-dependent transporter	1	6	0.166667
exporter of the RND superfamily protein	1	6	0.166667
putative glutamate dehydrogenase	1	6	0.166667
twitching motility protein PilT	1	6	0.166667
RDD domain containing protein	1	6	0.166667
putative membrane-associated Zn-dependent protease	1	6	0.166667
PaaX domain-containing protein	1	6	0.166667
N-acetylneuraminate synthase	1	6	0.166667
ISH10-type transposase ISHwa10	1	6	0.166667
protease HtpX	1	6	0.166667
zn-dependent protease with chaperone function	1	6	0.166667
MgtE integral membrane region	12	74	0.162162
dolichyl-phosphate-mannose-protein mannosyltransferase	3	19	0.157895
type II secretion system protein	13	83	0.156627
integrase protein	2	13	0.153846
putative transporter protein	2	13	0.153846
peptidase M50	30	198	0.151515
sulfite oxidase-like oxidoreductase	3	20	0.15
SOUL heme-binding protein	4	27	0.148148
integrase	8	56	0.142857
lycopene cyclase domain-containing protein	3	21	0.142857
metal-dependent hydrolase	3	21	0.142857
multi-copper enzyme maturation ABC transporter permease	2	14	0.142857
DNA topoisomerase type IA zn finger domain-containing protein	2	14	0.142857
metal-binding protein	2	14	0.142857
transcription initiation factor iib (tfiib)	2	14	0.142857
ABC transporter involved in lipoprotein release, permease component	1	7	0.142857
sensory rhodopsin 1	1	7	0.142857
transport ATPase 3 ( substrates copper/metal cation)	1	7	0.142857
citrate synthase II	1	7	0.142857
chitin-binding protein	1	7	0.142857
kef-type K+ transporter NAD-binding component	1	7	0.142857
Magnesium and cobalt efflux protein corC	1	7	0.142857
transposase (ISH7)	1	7	0.142857
transcriptional regulator NrdR	1	7	0.142857
binding-protein-dependent transport system inner membrane protein	33	232	0.142241
phosphate ABC transporter permease	28	201	0.139303
IS200-type transposase (TCE31)	4	29	0.137931
TRK potassium uptake system protein TrkH	4	29	0.137931
disulfide bond formation protein dsbb	3	22	0.136364
dmt(drug/metabolite transporter) superfamily permease	7	52	0.134615
prenyltransferase	22	165	0.133333
carbohydrate ABC transporter membrane protein 2, cut1 family	2	15	0.133333
cobalamin 5-phosphate synthase	2	15	0.133333
Mur ligase family CapB protein	2	15	0.133333
PHP domain-containing protein	23	173	0.132948
BioY protein	5	38	0.131579
glycine betaine transporter BetL	3	23	0.130435
transposase (ISH18)	3	23	0.130435
putative transcriptional regulator	15	116	0.12931
rhodopsin	5	39	0.128205
membrane-flanked domain-containing protein	7	56	0.125
IS1341-type transposase (TCE31)	4	32	0.125
6-phosphogluconolactonase	1	8	0.125
daunorubicin resistance ABC transporter ATP-binding protein	1	8	0.125
ethanolamine transporter	1	8	0.125
Altronate dehydratase	1	8	0.125
HNH-type endonuclease	1	8	0.125
PilT domain-containing protein	1	8	0.125
dihydrolipoyl dehydrogenase	1	8	0.125
potassium transport system protein trkH1	1	8	0.125
sodium-dependent transporter	7	57	0.122807
cobalamin 5'-phosphate synthase	5	41	0.121951
transcription initiation factor TFB	24	197	0.121827
XerC/D-like integrase	9	74	0.121622
Major Facilitator Superfamily transporter	9	74	0.121622
1,4-dihydroxy-2-naphthoate octaprenyltransferase	9	75	0.12
transposase (ISH51)	2	17	0.117647
Resolvase domain protein	2	17	0.117647
type IV pilus biogenesis complex membrane subunit	6	53	0.113208
polyphosphate kinase	7	63	0.111111
Bile acid:sodium symporter	3	27	0.111111
ISH11-type transposase ISHwa14	3	27	0.111111
phospholipase D	2	18	0.111111
UTP--glucose-1-phosphate uridylyltransferase	1	9	0.111111
Glycosyltransferase, family 2	1	9	0.111111
DNA-directed RNA polymerase epsilon subunit	1	9	0.111111
Na+ ABC efflux pump permease	1	9	0.111111
plasmid stabilization system	1	9	0.111111
TM2 domain-containing protein	1	9	0.111111
carotenoid biosynthesis protein	1	9	0.111111
membrane-bound mannosyltransferase	1	9	0.111111
lysine exporter	1	9	0.111111
molybdopterin oxidoreductase	8	74	0.108108
CaCA family Na+/Ca+ antiporter	3	28	0.107143
transcription initiation factor IIB	10	96	0.104167
lycopene cyclase domain protein	4	39	0.102564
lipoprotein	11	109	0.100917
site-specific recombinase xerd	6	60	0.1
phage integrase/site-specific recombinase	4	40	0.1
integrase-like protein	2	20	0.1
maltose ABC transporter permease	1	10	0.1
Integrase catalytic region	1	10	0.1
glycosyltransferase AglE	1	10	0.1
sodium- and chloride-dependent transporter	1	10	0.1
peptidase S24/S26A/S26B, conserved region	1	10	0.1
rhomboid-like intramembrane serine protease, N-terminal Zn finger	1	10	0.1
fla cluster protein FlaD2	1	10	0.1
HNH nuclease	1	10	0.1
50S ribosomal protein L37	1	10	0.1
superoxide dismutase (Mn)	1	10	0.1
Trk-type transport system ( substrate potassium) 1, subunit 2.1	1	10	0.1
ion transport 2 domain protein	1	10	0.1
preprotein translocase subunit SecY	8	82	0.097561
DNA-directed RNA polymerase subunit K	4	42	0.0952381
Transposase and inactivated derivatives-like protein	2	21	0.0952381
hydrolase-like protein	2	21	0.0952381
putative lipid/cholesterol transport	2	21	0.0952381
lysine exporter protein LysE/YggA	2	21	0.0952381
zinc transporter	5	54	0.0925926
monovalent cation/H+ antiporter subunit D	11	119	0.092437
HNH endonuclease	8	87	0.091954
H/ACA RNA-protein complex component Gar1	6	66	0.0909091
terminal quinol oxidase	3	33	0.0909091
integrase domain-containing protein SAM domain-containing protein	2	22	0.0909091
ABC-type dipeptide/oligopeptide/nickel transport systems, permease protein	1	11	0.0909091
putative sulfonate ABC transporter permease	1	11	0.0909091
sodium:solute symporter	1	11	0.0909091
ISH5-type transposase ISHwa5	1	11	0.0909091
major facilitator family transporter	1	11	0.0909091
crotonobetainyl-CoA:carnitine CoA-transferase /alpha-methylacyl-CoA racemase 1	1	11	0.0909091
protein tyrosine phosphatase	1	11	0.0909091
N-methyltransferase-like protein	1	11	0.0909091
AP endonuclease, family 2	1	11	0.0909091
resolvase	2	23	0.0869565
Rhomboid family protein	10	120	0.0833333
MATE family drug/sodium antiporter	2	24	0.0833333
luciferase monooxygenase	1	12	0.0833333
TRAP-type transport system permease protein	1	12	0.0833333
NH(3)-dependent NAD(+) synthetase	1	12	0.0833333
ATPase AAA containing von Willebrand factor type A (vWA) domain-like protein	1	12	0.0833333
Spermine/spermidine synthase family protein	1	12	0.0833333
sugar metabolism cluster protein	1	12	0.0833333
transcription factor TFIIB cyclin-related protein	19	237	0.0801688
disulfide bond formation protein	2	25	0.08
dolichyl-phosphate beta-D-mannosyltransferase	3	38	0.0789474
transposase (ISH8)	3	39	0.0769231
4-hydroxybenzoate polyprenyltransferase	1	13	0.0769231
binding-protein-dependent transporter inner membrane component	1	13	0.0769231
CheD	1	13	0.0769231
cytochrome b(C-terminal)/b6	1	13	0.0769231
Sodium:sulfate symporter transmembrane region superfamily protein	1	13	0.0769231
SSS sodium solute transporter superfamily protein	1	13	0.0769231
lysine exporter (LYSE/YGGA)	1	13	0.0769231
RNA 2'-phosphotransferase	1	13	0.0769231
integrase family protein	20	261	0.0766284
permease	6	80	0.075
small CPxCG-related zinc finger protein	6	80	0.075
4Fe-4S ferredoxin	5	67	0.0746269
oligopeptide transport system permease OppC	2	27	0.0740741
Na+/Ca+ antiporter, CaCA family protein	2	27	0.0740741
unspecific monooxygenase (cytochrome P450)	1	14	0.0714286
ferrous iron transport protein	1	14	0.0714286
beta-ketoadipyl CoA thiolase	1	14	0.0714286
membrane bound his kinase A	1	14	0.0714286
YbaK/prolyl-tRNA synthetase associated region	1	14	0.0714286
purine nucleoside permease	1	14	0.0714286
chaperone protein DnaJ	7	99	0.0707071
protein-tyrosine phosphatase, low molecular weight	4	57	0.0701754
Abortive infection protein	8	118	0.0677966
V-type ATP synthase subunit D	5	74	0.0675676
transposase (ISH5)	2	30	0.0666667
citrate transporter	2	30	0.0666667
cell wall biogenesis glycosyltransferase	1	15	0.0666667
gluconate transporter	1	15	0.0666667
Mn2 and Fe2 transporter of the NRAMP family-like protein	1	15	0.0666667
small heat shock protein	1	15	0.0666667
transposase ISH11	1	15	0.0666667
trk system potassium uptake protein TrkH	1	15	0.0666667
acetyl-CoA C-acetyltransferase	1	16	0.0625
FAD linked oxidase domain-containing protein	1	16	0.0625
cox cluster protein	1	16	0.0625
cytochrome-ba3 oxidase subunit	1	16	0.0625
transmembrane efflux protein	1	16	0.0625
transposase (ISH10)	1	16	0.0625
glycoside hydrolase family 18	1	16	0.0625
MscS Mechanosensitive ion channel	8	131	0.0610687
DegT/DnrJ/EryC1/StrS aminotransferase	2	33	0.0606061
MgtC/SapB transporter	2	33	0.0606061
DoxX family protein	9	150	0.06
ABC transporter	82	1375	0.0596364
cation transporter	6	101	0.0594059
polar amino acid ABC transporter permease	1	17	0.0588235
sodium/calcium exchanger membrane protein	1	17	0.0588235
Type II secretion system F domain protein	1	17	0.0588235
NADH/Ubiquinone/plastoquinone (complex I)	1	17	0.0588235
glycosyltransferase, type 1	1	17	0.0588235
acetyltransferase (gnat) family protein	1	17	0.0588235
IS630-type transposase ISHwa7	1	17	0.0588235
nitrate/sulfonate/bicarbonate ABC transporter periplasmic component-like protein	1	17	0.0588235
solute symporter protein	1	17	0.0588235
L-lysine exporter	1	17	0.0588235
heme synthase	1	17	0.0588235
band 7 protein	2	35	0.0571429
catalase	2	35	0.0571429
Polysulfide reductase NrfD	3	53	0.0566038
polyketide cyclase/dehydrase	5	90	0.0555556
putative maltose ABC transporter permease	1	18	0.0555556
Bacterial regulatory protein, arsR family	1	18	0.0555556
cytochrome d ubiquinol oxidase subunit I	1	18	0.0555556
ferredoxin-like protein	1	18	0.0555556
Membrane protein-like protein	1	18	0.0555556
HAD-superfamily hydrolase, subfamily IIA	1	18	0.0555556
FkbM family methyltransferase	1	18	0.0555556
CbaC protein	2	37	0.0540541
ribonuclease BN	9	169	0.0532544
cytochrome c oxidase subunit I	10	189	0.0529101
phosphate ABC transporter, inner membrane subunit PstC	1	19	0.0526316
glucosamine/fructose-6-phosphate aminotransferase, isomerizing	1	19	0.0526316
beta-galactosidase	1	19	0.0526316
two-component system sensor kinase	1	19	0.0526316
transcriptional regulator, padr family protein	1	19	0.0526316
AAA ATPase	2	39	0.0512821
glycosyl transferase	5	98	0.0510204
transposase (TCE33)	3	60	0.05
methylase involved in ubiquinone/menaquinone biosynthesis	2	40	0.05
integral membrane sensor signal transduction histidine kinase	2	40	0.05
fructosamine kinase	1	20	0.05
nucleolar protein-like protein	1	20	0.05
sulfate transporter family permease	1	20	0.05
death on curing protein	1	20	0.05
TRAP transporter, 4TM/12TM fusion protein	2	41	0.0487805
type 11 methyltransferase	13	268	0.0485075
phosphate ABC transporter substrate-binding protein, phot family	1	21	0.047619
citrate synthase	1	21	0.047619
FAD linked oxidase domain protein	1	21	0.047619
glucose fructose oxidoreductase	1	21	0.047619
phage integrase	2	43	0.0465116
exopolysaccharide biosynthesis polyprenyl glycosylphosphotransferase	2	43	0.0465116
KEOPS complex Pcc1-like subunit	2	44	0.0454545
N-carbamoyl-L-amino acid amidohydrolase	1	22	0.0454545
amino acid transporter	1	22	0.0454545
Disulfide bond formation protein DsbB	1	22	0.0454545
alkyl hydroperoxide reductase	1	22	0.0454545
signal-transducing histidine kinase-like protein	7	155	0.0451613
Na+/Ca2+-exchanging protein	2	45	0.0444444
globin	2	45	0.0444444
diaminobutyrate--pyruvate aminotransferase	1	23	0.0434783
sugar ABC transporter substrate binding protein	1	23	0.0434783
sugar ABC transporter permease protein	1	23	0.0434783
transposase (ISH6)	1	23	0.0434783
universal stress family protein	1	23	0.0434783
CAAX amino terminal protease	1	23	0.0434783
BCCT transporter	2	48	0.0416667
corrinoid ABC transporter substrate-binding protein	1	24	0.0416667
glucose dehydrogenase	1	24	0.0416667
conserved repeat domain protein	1	24	0.0416667
50S ribosomal protein LX	2	49	0.0408163
methyltransferase type 11	17	425	0.04
TRAP transporter 4TM/12TM fusion protein	1	25	0.04
circadian clock protein KaiC	1	25	0.04
CRISPR-associated protein Cas1	1	25	0.04
zinc finger SWIM domain protein	2	51	0.0392157
ribonuclease P protein component 1	2	52	0.0384615
ATP-binding protein	1	26	0.0384615
IucA/IucC family protein	1	26	0.0384615
Fe-S oxidoreductase	1	26	0.0384615
rhodanese	6	157	0.0382166
GNAT family acetyltransferase	4	106	0.0377358
glycosyl transferase family protein	3	81	0.037037
siroheme synthase	2	54	0.037037
ABC-type multidrug transport system, ATPase component	1	27	0.037037
MoxR-like ATPase	1	27	0.037037
DRTGG domain protein	1	27	0.037037
glycine betaine transporter	1	27	0.037037
transposase ISHwa4	1	27	0.037037
anion transporter	1	27	0.037037
2-keto-3-deoxygluconate kinase	1	27	0.037037
cryptochrome/photolyase-related protein Phr3	1	27	0.037037
AAA family ATPase	1	28	0.0357143
rpo operon protein	1	28	0.0357143
NADH dehydrogenase	3	85	0.0352941
dehydrogenase	2	57	0.0350877
nucleotidyltransferase	1	29	0.0344828
Ribosomal L37ae protein	1	29	0.0344828
transcriptional regulator, IclR family protein	2	59	0.0338983
Polyketide cyclase/dehydrase	3	90	0.0333333
site-specific recombinase XerD	2	60	0.0333333
phosphatidylserine decarboxylase	2	60	0.0333333
Resolvase domain-containing protein	1	30	0.0333333
site-specific recombinase	1	31	0.0322581
family 2 glycosyl transferase	7	218	0.0321101
mannonate dehydratase	1	32	0.03125
putative PAS/PAC sensing his kinase	1	32	0.03125
magnesium transporter accessory protein	1	32	0.03125
AbrB family transcriptional regulator	1	32	0.03125
ribonuclease P-related protein	1	32	0.03125
stress response protein	2	65	0.0307692
chaperone protein dnaJ	3	99	0.030303
hydrolase or acyltransferase of alpha/beta superfamily protein	1	33	0.030303
MgtE integral membrane protein	1	33	0.030303
phage T7 F exclusion suppressor FxsA	2	67	0.0298507
oxidoreductase molybdopterin binding protein	3	101	0.029703
response regulator receiver	1	34	0.0294118
glycoside hydrolase 15-like protein	1	34	0.0294118
transcriptional regulator, CopG family protein	1	34	0.0294118
30S ribosomal protein S10p	2	70	0.0285714
oligopeptide/dipeptide ABC transporter, ATPase subunit	1	35	0.0285714
thiolase	1	35	0.0285714
thiol-disulfide oxidoreductase DCC	1	35	0.0285714
glycosyl transferase group 1	5	177	0.0282486
Sec-independent periplasmic protein translocase	3	108	0.0277778
A/G-specific adenine glycosylase	1	36	0.0277778
FAD-linked oxidase domain protein	1	36	0.0277778
LAO/AO transporter ATPase	1	36	0.0277778
cationic amino acid transporter	4	145	0.0275862
mechanosensitive ion channel MscS	2	74	0.027027
cytochrome d ubiquinol oxidase subunit II	1	37	0.027027
putative ISH8 transposase	1	37	0.027027
mechanosensitive ion channel protein MscS	1	37	0.027027
alkaline phosphatase	1	37	0.027027
sodium:neurotransmitter symporter	2	76	0.0263158
carbamoyl-phosphate synthase L chain ATP-binding protein	1	38	0.0263158
nucleic acid binding OB-fold tRNA/helicase-type	1	38	0.0263158
ABC transporter-related protein	5	195	0.025641
Transcription factor TFIIB cyclin-related protein	6	237	0.0253165
extracellular solute-binding protein family 1	2	79	0.0253165
putative dipeptides/oligopeptides ABC transporter periplasmic substrate-binding protein	1	40	0.025
phytoene desaturase	1	40	0.025
transcriptional regulator PadR family protein	4	164	0.0243902
sulfate transporter	1	41	0.0243902
bacterio-opsin activator-like protein	6	249	0.0240964
monovalent cation/proton antiporter, MnhG/PhaG subunit	1	42	0.0238095
sugar kinase	1	42	0.0238095
polysaccharide deacetylase	5	212	0.0235849
transfer complex protein	1	43	0.0232558
peptidase S8/S53 subtilisin kexin sedolisin	1	43	0.0232558
chlorite dismutase	1	43	0.0232558
GCN5-like N-acetyltransferase	3	130	0.0230769
phage PhiH1 repressor protein	2	87	0.0229885
excinuclease ABC subunit C	2	87	0.0229885
blue (type 1) copper domain protein	1	44	0.0227273
Pyrrolo-quinoline quinone repeat-containing protein	1	44	0.0227273
carotene biosynthesis associated membrane protein	1	44	0.0227273
DNA-cytosine methyltransferase	1	44	0.0227273
HhH-GPD family protein	3	134	0.0223881
DSBA oxidoreductase	2	90	0.0222222
Glycosyltransferase-like protein	1	45	0.0222222
flagellin-like protein	1	45	0.0222222
amino acid permease-associated protein	1	46	0.0217391
putative hydrolase	1	46	0.0217391
transcriptional regulator, ArsR family protein	1	46	0.0217391
PadR family transcriptional regulator	3	139	0.0215827
inosine monophosphate dehydrogenase	1	47	0.0212766
ABC-1 domain-containing protein	1	47	0.0212766
flavin-containing amine-oxidoreductase	1	47	0.0212766
sensor protein	1	48	0.0208333
nitrite reductase	1	48	0.0208333
heavy metal translocating P-type ATPase	2	97	0.0206186
sodium/hydrogen exchanger	3	146	0.0205479
isochorismatase	1	49	0.0204082
dihydropteroate synthase	3	148	0.0202703
glycosyl transferase family 2	3	150	0.02
monovalent cation/H+ antiporter subunit B	2	100	0.02
radical SAM domain-containing protein	1	50	0.02
LtrC-like protein	1	50	0.02
ArsR family transcriptional regulator	9	451	0.0199557
putative sugar ABC transporter periplasmic substrate-binding protein	1	51	0.0196078
flagellar assembly protein J	1	51	0.0196078
monovalent cation/H+ antiporter subunit F	1	51	0.0196078
PilT protein domain-containing protein	2	104	0.0192308
AzlC family protein	1	52	0.0192308
GCN5-related N-acetyltransferase	6	336	0.0178571
TrkA-N domain-containing protein	3	168	0.0178571
alpha/beta fold family hydrolase	1	56	0.0178571
cobalt-precorrin-2 C(20)-methyltransferase	1	57	0.0175439
mechanosensitive ion channel	1	57	0.0175439
regulatory protein ArsR	1	59	0.0169492
halocyanin domain protein	1	60	0.0166667
aminoglycoside phosphotransferase	2	121	0.0165289
ribosomal-protein-alanine acetyltransferase	1	62	0.016129
L-lactate permease	1	63	0.015873
universal stress protein	4	254	0.015748
glutamate dehydrogenase	1	64	0.015625
terminal quinol oxidase subunit	1	64	0.015625
ThiJ/PfpI domain-containing protein	1	64	0.015625
radical SAM domain protein	1	65	0.0153846
signal-transducing histidine kinase	1	65	0.0153846
ammonium transporter	1	66	0.0151515
L-tyrosine decarboxylase	1	66	0.0151515
1-(5-phosphoribosyl)-5-[(5-phosphoribosylamino)methylideneamino] imidazole-4-carboxamide isomerase	1	66	0.0151515
phosphate ABC transporter ATP-binding protein	2	133	0.0150376
homoserine kinase	1	67	0.0149254
methionine sulfoxide reductase A	1	67	0.0149254
proteasome subunit alpha	2	135	0.0148148
50S ribosomal protein L32e	1	68	0.0147059
cell division control protein 6-like protein	1	69	0.0144928
glycerol kinase	1	70	0.0142857
pyruvate ferredoxin/flavodoxin oxidoreductase subunit beta	1	71	0.0140845
Na+/H+ antiporter	1	71	0.0140845
acetamidase/formamidase	1	71	0.0140845
HxlR family transcriptional regulator	1	72	0.0138889
histidine kinase	2	148	0.0135135
glucose-1-phosphate thymidylyltransferase	1	76	0.0131579
alpha/beta hydrolase	1	76	0.0131579
N-acetyltransferase GCN5	5	384	0.0130208
succinyl-diaminopimelate desuccinylase	1	78	0.0128205
TetR family transcriptional regulator	2	157	0.0127389
peptide chain release factor 1	1	79	0.0126582
glutamine amidotransferase	1	81	0.0123457
MoaD family protein	1	81	0.0123457
PfkB domain protein	1	82	0.0121951
UDP-N-acetylglucosamine 2-epimerase	1	82	0.0121951
ribonuclease R	1	83	0.0120482
orc1/cdc6 family replication initiation protein	3	257	0.0116732
N-ethylammeline chlorohydrolase	1	86	0.0116279
TrkA-C domain-containing protein	1	87	0.0114943
UspA domain-containing protein	16	1407	0.0113717
3-hydroxybutyryl-CoA dehydrogenase	1	88	0.0113636
phosphopantetheine adenylyltransferase	1	88	0.0113636
deoxyhypusine synthase	1	92	0.0108696
GTP-binding proten HflX	1	92	0.0108696
peptidase S26B, signal peptidase	1	92	0.0108696
DNA binding domain-containing protein	2	186	0.0107527
aminotransferase class I and II	1	93	0.0107527
cytochrome C oxidase subunit I	2	189	0.010582
3-hydroxyacyl-CoA dehydrogenase	1	96	0.0104167
deoxyribodipyrimidine photolyase	1	96	0.0104167
peptidase M28	1	96	0.0104167
molybdopterin-guanine dinucleotide biosynthesis protein A	1	97	0.0103093
Glycosyl transferase	1	98	0.0102041
peptidase m50	2	198	0.010101
HpcH/HpaI aldolase	1	99	0.010101
AMP-dependent synthetase and ligase	4	399	0.0100251
amidohydrolase 2	1	103	0.00970874
pas domain s-box	1	104	0.00961538
acetyltransferase	2	211	0.00947867
response regulator receiver protein	3	327	0.00917431
IclR family transcriptional regulator	2	218	0.00917431
extracellular solute-binding protein family 5	1	109	0.00917431
ferrichrome-binding protein	1	110	0.00909091
transcriptional regulator, PadR-like family protein	1	110	0.00909091
transcriptional regulator	9	996	0.00903614
Orc1-type DNA replication protein	1	111	0.00900901
glycosyltransferase	2	228	0.00877193
small GTP-binding protein	1	114	0.00877193
asparagine synthase	1	126	0.00793651
cobyrinic acid ac-diamide synthase	1	129	0.00775194
Trk potassium uptake system protein	1	129	0.00775194
group 1 glycosyl transferase	2	259	0.00772201
radical SAM protein	1	130	0.00769231
MCP domain-containing signal transducer	1	136	0.00735294
threonine dehydratase	1	136	0.00735294
acyl-CoA dehydrogenase domain-containing protein	1	141	0.0070922
dihydrodipicolinate synthase	1	147	0.00680272
alcohol dehydrogenase GroES domain protein	1	147	0.00680272
short-chain family oxidoreductase	1	148	0.00675676
aldo/keto reductase	3	449	0.00668151
cytochrome C oxidase subunit II	1	154	0.00649351
PAS/PAC sensor protein	1	155	0.00645161
glutaredoxin	1	155	0.00645161
HTR-like protein	3	519	0.00578035
nucleotidyl transferase	1	181	0.00552486
Nucleotidyl transferase	1	181	0.00552486
oxidoreductase domain-containing protein	1	183	0.00546448
ferredoxin	2	375	0.00533333
bacterio-opsin activator HTH domain-containing protein	3	576	0.00520833
endoribonuclease L-PSP	1	206	0.00485437
succinylglutamate desuccinylase/aspartoacylase	1	207	0.00483092
DNA mismatch repair protein MutS	1	211	0.00473934
short-chain dehydrogenase/reductase SDR	3	637	0.00470958
PAS/PAC sensor signal transduction histidine kinase	1	214	0.0046729
thioredoxin reductase	1	218	0.00458716
Glycosyltransferase	1	228	0.00438596
pyrrolo-quinoline quinone	1	231	0.004329
CopG family transcriptional regulator	1	237	0.00421941
FAD dependent oxidoreductase	1	239	0.0041841
AsnC family transcriptional regulator	2	495	0.0040404
XRE family transcriptional regulator	1	258	0.00387597
Bacterio-opsin activator HTH domain-containing protein	2	576	0.00347222
Bacterio-opsin activator HTH domain protein	1	300	0.00333333
NUDIX hydrolase	1	303	0.00330033
Aldehyde Dehydrogenase	1	313	0.00319489
aldehyde dehydrogenase	1	313	0.00319489
amidohydrolase	1	368	0.00271739
Glyoxalase/bleomycin resistance protein/dioxygenase	1	373	0.00268097
acyl-CoA dehydrogenase	1	399	0.00250627
cupin	1	428	0.00233645
UspA domain protein	1	455	0.0021978
uspA domain protein	1	455	0.0021978
beta-lactamase	1	553	0.00180832
NAD-dependent epimerase/dehydratase	1	558	0.00179211
